# Supplementary material for: Temporal and sequential order of nonoverlapping gene networks unraveled in mated female Drosophila
Source: Life Sci Alliance. 2021 Nov 29;5(2):e202101119. doi: 10.26508/lsa.202101119 (PMC8645335; doi:10.26508/lsa.202101119)
Supplement: Supplementary file 1 [file LSA-2021-01119_TableS1.xlsx]

## Sheet: differentially_expressed_at_1da
Gene name	Gene stable ID	1 day					4 days					20 days
		baseMean	FoldChange	log2FoldChange	pvalue	padj	baseMean	FoldChange	log2FoldChange	pvalue	padj	baseMean	FoldChange	log2FoldChange	pvalue	padj
Ac13E	FBgn0022710	3341.64	1.449	0.535	0.000466692	0.015327	3121.77	1.021	0.03	0.926476	0.999991	803.16	1.289	0.366	0.170834	0.838043
Acer	FBgn0016122	3148.22	0.639	-0.646	9.333e-06	0.000845197	4616.43	1.07	0.097	0.739337	0.999991	2444.11	0.617	-0.696	0.0269302	0.666483
Acn	FBgn0263198	9131.13	1.528	0.612	0.000181557	0.00764023	11587	1.02	0.028	0.93743	0.999991	1973.57	1.09	0.124	0.683546	0.948423
Acp1	FBgn0014454	130078	0.279	-1.844	1.77808e-06	0.000250453	618.92	0.462	-1.114	0.00176756	0.122906	14.73	0.214	-2.223	0.000155623	0.113765
Acp65Aa	FBgn0020765	467.07	0.188	-2.414	4.05261e-16	5.09729e-13	8.88	0.071	-3.821	0.019121	0.476666	1.31	0.59	-0.761	0.655494	0.943325
Act42A	FBgn0000043	1415.43	0.646	-0.631	6.85924e-05	0.00384389	965.29	1.088	0.122	0.746849	0.999991	374.62	0.962	-0.055	0.886544	0.979762
Act57B	FBgn0000044	114855	0.518	-0.948	1.91941e-05	0.00144426	33137.5	0.922	-0.117	0.702013	0.999991	8293.87	1.063	0.088	0.684653	0.948423
Act88F	FBgn0000047	2395.09	0.049	-4.352	0.000196604	0.00812412	108.72	0.406	-1.299	0.00625662	0.264312	40.41	0.834	-0.262	0.451652	0.915226
Ada1-1	FBgn0051865	57.3	3.805	1.928	0.00225803	0.0437981	65.45	0.67	-0.579	0.806251	0.999991	24.01	1.298	0.377	0.522436	0.921322
Ada3	FBgn0030891	292.15	1.7	0.765	0.00111056	0.0277988	319	0.93	-0.104	0.728484	0.999991	112.07	1.077	0.107	0.652346	0.943074
Adgf-C	FBgn0038173	379.95	1.574	0.654	0.00150977	0.0347369	296.15	1.123	0.167	0.580356	0.999991	61.38	0.813	-0.298	0.413	0.908332
Adk2	FBgn0283494	2422.04	0.655	-0.611	0.000288549	0.0108518	2130.79	1.094	0.13	0.702455	0.999991	724.12	0.783	-0.353	0.0832229	0.767345
AGBE	FBgn0053138	4783.92	0.421	-1.247	0.00103392	0.0263588	2653.9	0.611	-0.711	0.032243	0.593337	918.76	0.781	-0.356	0.0538035	0.720272
AGO2	FBgn0087035	11461.8	1.271	0.346	0.00234417	0.0448243	11594.6	0.992	-0.012	0.969987	0.999991	2981.37	1.054	0.076	0.655809	0.943325
Agpat4	FBgn0036622	544.77	0.432	-1.209	0.000430124	0.0144481	397.1	1.209	0.274	0.623692	0.999991	117.6	1.371	0.455	0.0319032	0.676989
AlaRS	FBgn0027094	1021.33	0.595	-0.75	0.00116101	0.0286486	1188.48	1.403	0.489	0.137791	0.849547	461.84	0.839	-0.254	0.165871	0.835769
Alg11	FBgn0037108	1183.31	0.645	-0.632	5.37611e-06	0.000567206	1198.96	1.132	0.179	0.482484	0.999991	524.89	0.833	-0.263	0.261209	0.865531
alpha-Est8	FBgn0015576	2128.74	0.623	-0.683	0.00161625	0.0364461	2146.68	1.316	0.396	0.144767	0.86528	1083.59	0.982	-0.026	0.937683	0.9848
alphaTub84B	FBgn0003884	29117.9	0.618	-0.694	3.88407e-08	1.07238e-05	22641.2	0.72	-0.475	0.101479	0.813212	7781.72	1.002	0.004	0.98489	0.995879
ArgRS	FBgn0027093	495.47	0.498	-1.005	0.000406284	0.0140646	470.9	1.354	0.437	0.214615	0.935846	219.8	0.927	-0.109	0.740138	0.969685
Arl1	FBgn0000115	688.59	0.622	-0.685	2.09178e-05	0.00152767	779	1.141	0.19	0.539346	0.999991	279.78	1.039	0.055	0.847973	0.979762
Asciz	FBgn0035407	253.53	1.995	0.996	0.00208688	0.0419558	218.56	1.246	0.318	0.407568	0.999991	83.26	0.977	-0.033	0.89848	0.979762
ASPP	FBgn0034606	2149.39	1.43	0.516	0.000390531	0.0136445	2093.55	0.809	-0.305	0.280873	0.966746	536.46	1.045	0.063	0.777576	0.97067
asRNA:CR43243	FBgn0262888	8.38	0.01	-6.607	0.00185504	0.0398463	6.15	1.286	0.363	0.797948	0.999991	2.56	0.22	-2.185	0.246289	0.865531
asRNA:CR43463	FBgn0266428	7.25	0.012	-6.378	0.000776082	0.0212325	1.1	4.813	2.267	0.603111		0.72	11.996	3.584	0.307095	0.883539
asRNA:CR45528	FBgn0267084	25.95	5.708	2.513	0.000632384	0.018704	14.95	1.262	0.335	0.724668	0.999991	1.39	0.165	-2.598	0.191383	0.849956
asRNA:CR46058	FBgn0267725	11.07	116.221	6.861	0.0001731	0.00745055	3.12	2.631	1.396	0.534458	0.999991	2	32.958	5.043	0.00537059	0.443258
Atg17	FBgn0037363	4800.61	1.622	0.698	7.08732e-05	0.0038733	4248.63	1.021	0.031	0.949862	0.999991	1666.18	1.169	0.226	0.167572	0.835769
ATP7	FBgn0030343	1246.23	0.703	-0.509	0.00233634	0.0448187	1196.36	1.256	0.329	0.320223	0.978326	412.42	1.006	0.009	0.956502	0.986774
ATPsynD	FBgn0016120	18708.7	0.74	-0.434	0.00134298	0.0319309	9779.97	0.503	-0.992	4.9953e-06	0.00180578	2768.07	1.155	0.207	0.33806	0.896286
Atx2	FBgn0041188	7491.9	1.278	0.354	0.0017804	0.0388326	6697.21	0.895	-0.16	0.530702	0.999991	1609.83	1.274	0.35	0.223311	0.856764
aurA	FBgn0000147	36.38	4.242	2.085	0.000468475	0.015327	43.86	0.995	-0.007	0.99052	0.999991	18.26	1.493	0.578	0.225081	0.856764
bai	FBgn0045866	474.18	0.527	-0.924	0.000283309	0.010726	548.1	1.274	0.35	0.287285	0.967705	222.91	0.93	-0.104	0.608773	0.93071
Balat	FBgn0033778	133.48	0.27	-1.888	0.000713475	0.0200909	67.12	1.353	0.436	0.555508	0.999991	30.36	0.781	-0.357	0.576784	0.921322
bam	FBgn0000158	18.58	110.942	6.794	0.00170204	0.0375577	1.59	0.067	-3.9	0.379799		0
bc10	FBgn0040239	3018.89	1.578	0.658	0.000315428	0.0115502	3162.84	0.912	-0.133	0.706861	0.999991	556.52	1.497	0.582	0.208233	0.856764
beta'COP	FBgn0025724	1291.15	0.593	-0.755	3.6691e-06	0.000432649	1376.32	1.069	0.096	0.748868	0.999991	629.52	0.773	-0.372	0.105878	0.797086
betaCOP	FBgn0008635	2111.61	0.745	-0.425	0.00163758	0.0365462	2318.06	0.779	-0.36	0.268051	0.9568	936.23	0.943	-0.084	0.597091	0.926026
betaggt-II	FBgn0028970	360.78	0.539	-0.891	0.00256508	0.0478835	356.33	0.825	-0.278	0.55881	0.999991	157.06	0.731	-0.452	0.277626	0.873162
bi	FBgn0000179	1404.85	1.478	0.564	0.00162677	0.0365379	1331.49	0.789	-0.342	0.265929	0.956365	371.31	2.15	1.104	0.0226081	0.645792
BicC	FBgn0000182	494.08	15.487	3.953	1.55789e-07	3.14916e-05	62	0.019	-5.755			16.05	71.308	6.156	0.0643851	0.737474
BigH1	FBgn0038252	130.47	11.629	3.54	9.09618e-10	4.4769e-07	13.35	0.008	-6.942	0.115575	0.820253	3.56	28.926	4.854	0.00857711	0.497907
bond	FBgn0260942	1156	0.507	-0.979	3.78044e-05	0.00244541	603.33	0.74	-0.435	0.0946524	0.811416	271.7	0.609	-0.715	0.0098636	0.523117
bora	FBgn0259791	15.5	92.266	6.528	0.000778399	0.0212325	3.9	0.359	-1.479	0.515516	0.999991	2.34	1.918	0.939	0.63662	0.938409
BTBD9	FBgn0030228	1314.83	1.731	0.792	8.52434e-06	0.000804129	1282.92	0.792	-0.337	0.184658	0.911517	357.04	1.276	0.351	0.212364	0.856764
CaBP1	FBgn0025678	1081.32	0.434	-1.206	8.53537e-05	0.00439184	892.48	1.187	0.248	0.49954	0.999991	474.99	0.902	-0.149	0.599099	0.92672
Cad99C	FBgn0039709	1854.26	0.664	-0.59	5.45242e-06	0.000567206	1039.23	0.668	-0.582	0.0117087	0.368007	298.71	1.246	0.317	0.117487	0.798725
Caf1-180	FBgn0030054	618.09	2.475	1.308	0.000255575	0.00994196	296.49	0.928	-0.107	0.85288	0.999991	61.01	2.248	1.168	0.0950824	0.7852
Cand1	FBgn0027568	1131.76	0.653	-0.614	6.94968e-05	0.00384783	1095.71	1.01	0.015	0.955342	0.999991	407.38	1.089	0.123	0.488047	0.917874
Cat	FBgn0000261	7788.01	0.603	-0.73	8.30983e-09	3.03443e-06	5420.54	0.623	-0.684	0.0157816	0.433449	3001.13	0.832	-0.265	0.237205	0.86167
cav	FBgn0026257	138.92	2.923	1.548	8.3075e-07	0.000128823	91.49	0.823	-0.281	0.612524	0.999991	26.99	1.25	0.322	0.443469	0.915226
CBP	FBgn0026144	188.6	2.767	1.468	1.30899e-05	0.00108954	100.43	1.164	0.219	0.759109	0.999991	33.21	4.861	2.281	0.00232585	0.308408
Cbp80	FBgn0022942	479.43	0.633	-0.661	0.000517942	0.0163318	457.2	1.096	0.133	0.694677	0.999991	205.02	0.937	-0.094	0.700154	0.954185
Ccp84Aa	FBgn0004783	191.15	0.347	-1.526	6.03134e-06	0.000615088	3.87	0.029	-5.13	0.0909649	0.801358	0
Ccp84Ab	FBgn0004782	296.27	0.283	-1.819	6.51819e-05	0.00371536	9.96	0.031	-5.023	0.00601207	0.262404	0
Cda4	FBgn0052499	352.8	0.48	-1.06	1.74868e-05	0.0013466	54.26	0.375	-1.415	0.0244907	0.540776	16.87	1.266	0.341	0.624174	0.933783
Cdc6	FBgn0035918	106.78	3.505	1.809	2.31137e-06	0.000309303	25.5	0.205	-2.287	0.0654906	0.763716	5.26	1.825	0.868	0.562922	0.921322
Cdc7	FBgn0028360	2610.43	2.634	1.397	4.4873e-14	3.9074e-11	2843.79	0.641	-0.642	0.0674644	0.767245	602.05	0.966	-0.049	0.820447	0.979762
CG10055	FBgn0037482	1382.04	1.613	0.69	1.25508e-05	0.00105373	1870.79	1.702	0.767	0.00545204	0.253854	286.82	0.989	-0.016	0.923901	0.98131
CG10097	FBgn0038033	12.57	0.014	-6.121	0.000330421	0.0119301	3.98	1.573	0.653	0.796985	0.999991	4.53	1.324	0.405	0.782614	0.971474
CG10321	FBgn0034643	1882.87	1.432	0.518	0.0014929	0.0344889	2178.28	1.125	0.169	0.484722	0.999991	500.35	1.031	0.044	0.839959	0.979762
CG10433	FBgn0034638	6255.92	1.658	0.73	3.8137e-07	6.54107e-05	12017.7	0.998	-0.002	0.994783	0.999991	5895.01	1.02	0.029	0.861172	0.979762
CG10514	FBgn0039312	289.53	0.49	-1.028	9.89522e-06	0.000882	247.14	0.798	-0.326	0.528682	0.999991	55.08	1.399	0.484	0.198914	0.856764
CG10570	FBgn0040992	22113.5	1.46	0.546	0.000119763	0.00579369	21941.4	0.799	-0.324	0.257235	0.954185	4944.15	1.294	0.371	0.0596118	0.733165
CG10936	FBgn0034253	2217	0.661	-0.597	4.26594e-05	0.0026828	537.27	0.556	-0.846	0.00312507	0.176464	106.12	1.207	0.271	0.299252	0.881361
CG11070	FBgn0028467	686.12	0.662	-0.594	0.000628293	0.0186674	680.96	1.296	0.375	0.288201	0.967728	255.45	0.811	-0.302	0.297252	0.881361
CG11345	FBgn0035546	188.56	0.303	-1.721	9.18861e-07	0.000140561	4.71	0.13	-2.943	0.143422	0.860916	2.49	40.584	5.343	0.00162429	0.256775
CG1136	FBgn0035490	1110.37	0.664	-0.591	0.000452577	0.0151126	467.65	0.811	-0.303	0.307015	0.97331	156.62	1.239	0.31	0.124412	0.799973
CG11417	FBgn0024364	632.15	1.906	0.931	0.00174222	0.0382208	882.39	1.728	0.789	0.00164239	0.120964	145.07	1.043	0.061	0.86678	0.979762
CG11425	FBgn0037167	569.59	0.262	-1.933	0.00263195	0.0487622	324.08	4.248	2.087	0.00145177	0.115267	212.77	1.376	0.461	0.501136	0.921089
CG11459	FBgn0037396	548.23	0.427	-1.226	0.000525992	0.0165395	436.61	1.22	0.287	0.306182	0.973255	342.16	0.778	-0.363	0.344067	0.897362
CG11596	FBgn0023522	466.29	2.025	1.018	1.25665e-05	0.00105373	493.87	1.23	0.299	0.249485	0.951021	111.87	1.123	0.167	0.67227	0.948423
CG11852	FBgn0039297	184.78	0.296	-1.755	1.36237e-07	2.91106e-05	77.26	0.823	-0.28	0.582445	0.999991	28.32	0.724	-0.467	0.239504	0.86167
CG11911	FBgn0031249	71.23	0.024	-5.352	0.000141468	0.00650982	0.09	0.544	-0.879	0.846751		3.17	0.455	-1.136	0.370535	0.902847
CG11961	FBgn0034436	539.97	0.533	-0.908	0.00227044	0.0439138	540.56	1.056	0.079	0.798448	0.999991	327	0.686	-0.544	0.0306883	0.676989
CG11999	FBgn0037312	420.84	0.516	-0.955	7.22605e-05	0.00390701	525.33	0.773	-0.372	0.272248	0.958534	230.45	0.951	-0.073	0.692286	0.951157
CG12011	FBgn0035257	37.07	76.935	6.266	0.000637527	0.018704	21.54	49.074	5.617	0.000641383	0.0725281	3.01	0.279	-1.844	0.136491	0.810879
CG12179	FBgn0025388	389.02	1.956	0.968	0.000467765	0.015327	317.12	0.798	-0.326	0.373095	0.993889	83.14	1.662	0.733	0.0989547	0.788459
CG12204	FBgn0031022	299.53	1.718	0.78	0.00274147	0.0497448	432.85	0.779	-0.36	0.384634	0.997586	76.29	1.424	0.509	0.212448	0.856764
CG12279	FBgn0038080	209.93	0.512	-0.966	0.000777744	0.0212325	191.49	0.728	-0.458	0.181541	0.908514	62.09	0.814	-0.297	0.530068	0.921322
CG12316	FBgn0036483	914.32	1.675	0.744	8.90361e-05	0.00454004	865.22	0.868	-0.205	0.551197	0.999991	216.18	1.027	0.039	0.851112	0.979762
CG12355	FBgn0040805	155.24	0.436	-1.198	0.000234135	0.00923487	121.87	1.349	0.432	0.296076	0.971524	59.04	0.532	-0.911	0.0930351	0.782766
CG12688	FBgn0029707	6.57	0.013	-6.25	0.00209338	0.0419558	1.94	2.152	1.106	0.764084	0.999991	0.66	0.577	-0.794	0.829286	0.979762
CG1275	FBgn0035321	3160.71	0.678	-0.561	0.000314966	0.0115502	2870.1	0.752	-0.412	0.177437	0.902928	978.18	0.721	-0.472	0.0556747	0.720387
CG12877	FBgn0039544	1173.66	1.71	0.774	0.000668236	0.0192479	1208.19	1.073	0.102	0.7884	0.999991	231.77	1.133	0.181	0.594928	0.925338
CG12998	FBgn0030829	199.93	0.149	-2.748	3.20696e-05	0.0021481	0.19	0.389	-1.363	0.763805		0.16	4.206	2.073	0.587138	0.921322
CG13024	FBgn0036665	627.91	0.479	-1.061	0.000136191	0.00631838	168.18	0.882	-0.181	0.646274	0.999991	27.57	0.989	-0.016	0.973232	0.991894
CG13026	FBgn0036656	1060.64	0.623	-0.682	0.00124285	0.0301264	316.51	0.513	-0.962	0.00275947	0.16881	3.5	0.584	-0.776	0.54137	0.921322
CG13041	FBgn0036605	130.9	0.445	-1.169	0.0025286	0.0473904	1.27	5.949	2.573	0.45226		2.56	5.031	2.331	0.133209	0.810643
CG13043	FBgn0036600	285.85	0.266	-1.911	6.15776e-08	1.54902e-05	0.62	8.368	3.065	0.486484		0.33	6.46	2.692	0.479373	0.915226
CG13044	FBgn0036599	1665.16	0.35	-1.516	0.000821641	0.0220926	2.53	0.293	-1.771	0.466487	0.999991	17.35	25.273	4.66	0.00170015	0.261981
CG13056	FBgn0040794	68.17	0.082	-3.617	1.72689e-08	5.43011e-06	3.39	19.149	4.259	0.08681	0.796588	2.56	2.521	1.334	0.50544	0.921322
CG13059	FBgn0036607	95.07	0.086	-3.532	8.26105e-12	5.50089e-09	3.43	2.038	1.027	0.59825	0.999991	2.85	0.506	-0.982	0.408518	0.908332
CG13063	FBgn0036601	13.46	0.006	-7.279	1.01645e-05	0.000890382	0					0
CG13065	FBgn0036590	45.53	0.002	-9.036	6.44107e-11	3.83752e-08	0					0.33	4.206	2.073	0.587138	0.921322
CG13067	FBgn0036589	4859.54	0.284	-1.817	1.36295e-07	2.91106e-05	937.07	0.516	-0.954	0.00114859	0.103698	183.42	1.002	0.003	0.990478	0.997366
CG13068	FBgn0036588	10.48	0.017	-5.87	0.000279776	0.0106635	0.79	10.704	3.42	0.435709		4.29	0.218	-2.194	0.203886	0.856764
CG13082	FBgn0032803	466.9	0.529	-0.92	0.000642099	0.018704	158.68	0.559	-0.84	0.0292856	0.574026	63.7	1.15	0.202	0.623967	0.933616
CG13185	FBgn0033661	1730.46	1.81	0.856	6.58299e-08	1.61097e-05	2618.52	2.031	1.022	1.47289e-05	0.0043392	453.23	0.978	-0.032	0.860565	0.979762
CG13282	FBgn0032612	13.36	30.376	4.925	0.00116337	0.0286486	13.79	1.101	0.139	0.932427	0.999991	2.64	2.691	1.428	0.444621	0.915226
CG13315	FBgn0040827	37402.7	2.285	1.192	1.04745e-18	2.37142e-15	55631.1	0.983	-0.024	0.905143	0.999991	15320.1	0.9	-0.152	0.616474	0.932379
CG13362	FBgn0029531	10.34	107.891	6.753	7.69542e-05	0.00403297	8.77	7.283	2.864	0.0770033	0.787891	1.49	0.421	-1.249	0.535009	0.921322
CG13531	FBgn0034786	465.52	0.641	-0.641	0.00103335	0.0263588	459.45	1.068	0.095	0.743902	0.999991	255	0.841	-0.249	0.39772	0.908332
CG13560	FBgn0034899	66.13	3.374	1.754	0.000721856	0.0202765	53.96	0.767	-0.382	0.484199	0.999991	26.63	11.274	3.495	0.00415283	0.395391
CG13566	FBgn0034942	11.97	0.062	-4.016	0.000734415	0.0204861	2.23	2.556	1.354	0.588543	0.999991	0.25	0.466	-1.101	0.767613	0.970432
CG13631	FBgn0040600	1223.06	1.441	0.527	0.000211666	0.00855737	1529.2	1.229	0.297	0.290502	0.970548	405.1	1.134	0.182	0.484554	0.915819
CG13643	FBgn0040601	319.79	0.459	-1.123	4.12089e-05	0.0026207	65.54	0.632	-0.662	0.222537	0.94244	18.67	5.014	2.326	0.0422027	0.694714
CG13670	FBgn0035873	312.66	2.694	1.43	6.82019e-07	0.000110292	609	1.837	0.877	0.0161474	0.434557	79.72	0.9	-0.152	0.791004	0.973359
CG13676	FBgn0035844	1702.08	0.374	-1.417	0.000625027	0.0186192	41.4	0.251	-1.995	0.00180527	0.123232	29.31	5.279	2.4	0.00639382	0.479889
CG13678	FBgn0035859	54.57	0.313	-1.677	0.00024854	0.00970162	26.07	0.587	-0.768	0.336871	0.984536	10.33	3.653	1.869	0.0151621	0.576904
CG13705	FBgn0035582	130.52	0.364	-1.457	1.68559e-05	0.00130691	0.71	4.627	2.21	0.614461		5	0.461	-1.116	0.333892	0.895638
CG13721	FBgn0035554	31.88	0.089	-3.485	0.0020959	0.0419558	0					0
CG13905	FBgn0035176	30.63	318.333	8.314	1.02134e-05	0.000890382	3.63	0.031	-5.035	0.0530477	0.704471	0
CG14036	FBgn0031677	63.99	22.819	4.512	7.44292e-05	0.00397424	4.48	0.024	-5.385	0.119282	0.820253	3.93	16.724	4.064	0.063206	0.737299
CG14073	FBgn0036814	2724.43	1.406	0.491	0.00189339	0.040137	2685.47	1.281	0.357	0.29648	0.971524	583.46	1.439	0.525	0.0996986	0.790871
CG14186	FBgn0036935	1939.66	1.552	0.634	1.90788e-05	0.00144426	2652.45	1.002	0.003	0.989921	0.999991	645.45	0.87	-0.201	0.504712	0.921322
CG14245	FBgn0039452	42.83	20.46	4.355	0.00251108	0.0471399	1.15	0.096	-3.381	0.434145		4.22	18.254	4.19	0.00302961	0.335259
CG14304	FBgn0038629	174.92	0.341	-1.553	7.14578e-08	1.68521e-05	17.13	0.708	-0.499	0.718694	0.999991	4.79	4.546	2.185	0.1257	0.799973
CG14545	FBgn0040602	16.96	101.177	6.661	0.00237077	0.0451804	1.51	0.226	-2.149	0.595191		0.99	16.186	4.017	0.216992	0.856764
CG14573	FBgn0037125	9.93	0.009	-6.823	0.000174981	0.00747464	0					0
CG14645	FBgn0040687	48.67	0.035	-4.847	0.00268324	0.0492289	66.31	142.844	7.158	0.0918037	0.803927	65.46	1072.87	10.067	0.00621204	0.474261
CG14657	FBgn0037282	1486.82	1.476	0.562	0.000609651	0.0182573	1400.64	0.729	-0.456	0.113425	0.820253	321.11	1.172	0.229	0.529307	0.921322
CG14661	FBgn0037288	4895.15	0.602	-0.732	0.000154989	0.00692052	2814.65	0.72	-0.474	0.0485917	0.684257	1212.64	1.062	0.087	0.514951	0.921322
CG14756	FBgn0033275	9.3	96.836	6.597	0.000203034	0.00826744	1.82	24.667	4.625	0.18036		0.75	0.156	-2.684	0.428032	0.910468
CG14814	FBgn0023515	290.93	8.827	3.142	5.59676e-08	1.43989e-05	108.17	0.814	-0.297	0.626764	0.999991	38.01	1.521	0.605	0.394049	0.908014
CG15011	FBgn0035518	240.25	0.513	-0.963	0.000678147	0.0194345	264.16	0.923	-0.116	0.793221	0.999991	85.05	0.991	-0.013	0.958301	0.986774
CG15024	FBgn0040699	43.07	0.188	-2.408	5.62826e-05	0.003371	0					0.76	0.154	-2.703	0.425108	0.90945
CG15080	FBgn0034391	1043.63	0.324	-1.624	8.10846e-12	5.50089e-09	99.39	0.694	-0.526	0.368942	0.991555	47.96	1.456	0.542	0.432376	0.910468
CG15117	FBgn0034417	304.55	0.462	-1.115	3.8554e-06	0.000445339	276.36	0.925	-0.113	0.746681	0.999991	196.15	0.813	-0.3	0.34573	0.897362
CG15282	FBgn0028855	133.38	2.442	1.288	0.00215569	0.0424963	205.38	1.144	0.194	0.765314	0.999991	46.39	1.25	0.322	0.560633	0.921322
CG15465	FBgn0029746	6212.13	1.502	0.587	0.000538048	0.0168252	7299.06	1.342	0.424	0.143318	0.860916	918.28	1.101	0.139	0.528342	0.921322
CG15506	FBgn0039686	367.34	0.407	-1.298	1.54519e-10	8.74578e-08	52.46	0.978	-0.032	0.975187	0.999991	38.21	1.708	0.773	0.263587	0.867537
CG15515	FBgn0039719	339.2	0.233	-2.104	0.000950993	0.0246909	38.49	0.448	-1.159	0.182826	0.909662	2.8	0.279	-1.843	0.170654	0.838043
CG15546	FBgn0039807	861.12	0.633	-0.66	0.00225443	0.0437981	328.45	0.482	-1.054	0.00158357	0.119265	92.66	0.732	-0.45	0.183687	0.844342
CG15617	FBgn0034151	21.67	0.004	-7.95	0.00106122	0.0266956	0.62	0.803	-0.316	0.944286		0
CG15695	FBgn0038832	426.26	0.601	-0.735	0.000801434	0.0218083	477	1.311	0.39	0.200583	0.927896	148.32	1.283	0.36	0.422453	0.90945
CG15765	FBgn0029814	27582.1	1.694	0.76	0.000591213	0.0179424	26329.1	0.851	-0.233	0.610657	0.999991	3345.05	1.5	0.585	0.173625	0.838043
CG1646	FBgn0039600	3566.51	1.342	0.424	0.00196436	0.0408761	4053.81	1.065	0.091	0.670942	0.999991	908.69	0.956	-0.064	0.696394	0.952602
CG1648	FBgn0033446	8266.2	1.64	0.714	3.80603e-07	6.54107e-05	9019.43	1.005	0.007	0.980341	0.999991	3039.3	1.19	0.252	0.219635	0.856764
CG1677	FBgn0029941	5805.85	1.418	0.504	3.11834e-05	0.00210117	7163.5	1.354	0.437	0.0935884	0.808027	1164.64	1.138	0.186	0.450764	0.915226
CG16786	FBgn0034974	2236.67	0.493	-1.02	0.000776002	0.0212325	547.9	0.582	-0.782	0.0203531	0.490005	148.66	1.377	0.462	0.246551	0.865531
CG16826	FBgn0032505	1305.14	0.202	-2.309	0.00041768	0.0141986	1861.46	0.407	-1.296	0.32677	0.979174	508.09	1.568	0.649	0.633831	0.938019
CG17271	FBgn0038829	1790.02	0.639	-0.646	0.000577242	0.0176809	1979.53	0.843	-0.247	0.284108	0.966746	823.55	1.035	0.05	0.847449	0.979762
CG17325	FBgn0040993	2342.77	2.57	1.362	2.60476e-06	0.000331302	3739.65	0.533	-0.907	0.00345057	0.186614	1572.31	1.282	0.358	0.334152	0.895638
CG17508	FBgn0039970	1374.76	1.537	0.62	6.67946e-06	0.000640776	2115.68	0.879	-0.186	0.591858	0.999991	1037.47	0.897	-0.157	0.514946	0.921322
CG17707	FBgn0025835	79.74	0.173	-2.527	1.47816e-05	0.00118672	4.5	0.572	-0.806	0.711585	0.999991	3.53	5.678	2.505	0.175253	0.838043
CG17754	FBgn0030114	1172.86	0.57	-0.811	0.000127579	0.00604264	665.46	0.994	-0.009	0.973606	0.999991	259.19	0.979	-0.03	0.866854	0.979762
CG17778	FBgn0023534	323.87	2.01	1.007	0.00148485	0.0343732	423.62	1.282	0.358	0.291043	0.970548	78.26	0.796	-0.329	0.380566	0.906843
CG17802	FBgn0038549	585.44	2.202	1.139	1.42852e-07	2.94016e-05	672.87	1.355	0.438	0.267664	0.9568	80.82	1.076	0.106	0.77446	0.97051
CG17803	FBgn0038547	73.34	2.877	1.525	0.000830865	0.0222877	87.82	1.487	0.573	0.321497	0.978326	26.66	1.026	0.037	0.926993	0.982279
CG18273	FBgn0029525	362.55	1.691	0.758	0.000642744	0.018704	534.72	1.949	0.962	0.00243397	0.15308	130.17	0.949	-0.076	0.696488	0.952602
CG2182	FBgn0037360	3568.8	1.367	0.451	0.00195883	0.040836	3894.86	1.197	0.26	0.396296	0.999991	852.68	1.021	0.031	0.887529	0.979762
CG2617	FBgn0032877	16.94	0.033	-4.941	0.000126933	0.00603734	22.87	0.594	-0.753	0.331507	0.983707	6.96	2.149	1.103	0.203767	0.856764
CG2650	FBgn0000092	50.62	0.192	-2.38	0.000805391	0.0218634	13.3	0.343	-1.544	0.445704	0.999991	1.47	0.155	-2.689	0.135203	0.810879
CG2812	FBgn0034931	103.13	0.427	-1.228	0.00142356	0.0335025	120.29	0.937	-0.095	0.824886	0.999991	48.53	1.261	0.335	0.493061	0.918888
CG2852	FBgn0034753	3845.77	0.584	-0.775	0.00124025	0.0301264	3353.49	0.759	-0.398	0.215434	0.936069	1838.9	0.923	-0.116	0.324984	0.890154
CG2861	FBgn0029728	7.73	45.796	5.517	0.00128903	0.0310015	14.51	0.69	-0.535	0.65609	0.999991	3.36	1.205	0.269	0.865039	0.979762
CG30197	FBgn0050197	2078.01	0.628	-0.671	0.00114226	0.0284184	1445.85	0.997	-0.004	0.987732	0.999991	552.71	0.817	-0.292	0.186166	0.847476
CG30291	FBgn0050291	946.68	0.623	-0.682	0.000219165	0.00873571	909.56	0.971	-0.042	0.874168	0.999991	389.62	0.842	-0.248	0.255613	0.865531
CG30389	FBgn0050389	6361.92	1.405	0.491	8.29201e-05	0.0042861	6252.79	0.944	-0.083	0.784214	0.999991	1074.17	1.196	0.259	0.388867	0.906843
CG30427	FBgn0043792	295.29	0.604	-0.728	0.000922438	0.0241713	225.72	0.638	-0.647	0.0983143	0.812466	92.92	0.651	-0.62	0.0248507	0.654932
CG31028	FBgn0051028	60.91	0.371	-1.429	0.000938002	0.0244217	10.18	0.383	-1.384	0.365485	0.989504	2.04	0.216	-2.211	0.206213	0.856764
CG31140	FBgn0051140	7295.77	1.4	0.486	0.000132413	0.00624549	6428.05	0.996	-0.006	0.982138	0.999991	1608.17	1.141	0.191	0.366062	0.900691
CG31259	FBgn0051259	10.41	0.008	-6.886	0.00270906	0.0496223	2.17	3.891	1.96	0.514765	0.999991	1.48	0.291	-1.779	0.391263	0.906843
CG31321	FBgn0051321	291.37	0.541	-0.887	0.000268884	0.0103031	283.56	0.759	-0.398	0.29323	0.970856	121.82	1.252	0.324	0.179055	0.841313
CG31676	FBgn0051676	776.5	0.692	-0.53	0.00233992	0.0448187	729.33	1.02	0.028	0.922979	0.999991	209.47	0.982	-0.027	0.897742	0.979762
CG31697	FBgn0051697	6.44	0.014	-6.202	0.00160819	0.0363367	5.49	1.009	0.012	0.994919	0.999991	2.2	0.733	-0.448	0.747771	0.970432
CG31712	FBgn0051712	4791.48	1.298	0.377	0.00199248	0.0410835	5113.73	0.855	-0.227	0.479867	0.999991	1110.39	1.231	0.3	0.133149	0.810643
CG31792	FBgn0051792	8.89	0.019	-5.721	0.000583187	0.0177465	0.68	2.402	1.264	0.774724		1.23	0.095	-3.394	0.247018	0.865531
CG31904	FBgn0260479	144.03	0.191	-2.39	0.00190349	0.0402299	19.87	0.871	-0.199	0.894746	0.999991	3.21	1.556	0.638	0.554998	0.921322
CG32037	FBgn0052037	36.08	6.543	2.71	4.25952e-05	0.0026828	39.68	0.977	-0.034	0.961281	0.999991	7	0.792	-0.336	0.785165	0.972248
CG32191	FBgn0052191	179.82	0.507	-0.979	0.000607419	0.0182387	236.05	1.184	0.243	0.429711	0.999991	126.01	0.872	-0.198	0.416739	0.908332
CG32198	FBgn0052198	14.39	0.006	-7.351	1.45414e-05	0.00118423	10.68	0.06	-4.059	0.0258211	0.553768	12.29	26.155	4.709	0.00752163	0.479889
CG32202	FBgn0052202	147.97	2.918	1.545	0.000437977	0.0146683	124.83	0.68	-0.556	0.309762	0.97429	47.84	1.984	0.989	0.0469621	0.706734
CG32532	FBgn0052532	652.68	1.542	0.624	0.00199116	0.0410835	735.37	0.928	-0.108	0.736185	0.999991	136.6	1.227	0.295	0.527586	0.921322
CG32767	FBgn0052767	4298.73	1.389	0.474	0.0013455	0.0319309	4641.87	1.165	0.22	0.582919	0.999991	999.03	1.454	0.54	0.0287993	0.673505
CG3301	FBgn0038878	680.79	0.59	-0.762	0.000170063	0.00737591	638.67	0.645	-0.632	0.172226	0.900497	334.57	0.767	-0.382	0.219934	0.856764
CG33080	FBgn0053080	762.6	0.596	-0.746	0.0024588	0.0466224	980.19	1.053	0.075	0.839554	0.999991	407.91	0.851	-0.233	0.492397	0.918808
CG33181	FBgn0053181	7259.52	1.516	0.601	1.1436e-07	2.53834e-05	7242.48	1.096	0.132	0.644339	0.999991	1113.4	1.418	0.504	0.149021	0.820022
CG3335	FBgn0036018	392.93	1.714	0.778	0.0023233	0.0446515	596.92	1.609	0.686	0.0388326	0.633233	118.37	0.767	-0.382	0.208968	0.856764
CG3348	FBgn0040609	2470.04	2.465	1.301	3.76285e-12	3.04253e-09	2099.94	2.594	1.375	0.00123356	0.105417	137.05	5.77	2.528	0.021896	0.643572
CG34179	FBgn0085208	18.38	0	-21.333	3.49529e-11	2.19815e-08	51.51	1.728	0.789	0.831322	0.999991	3.42	0.034	-4.874	0.121921	0.798725
CG34227	FBgn0085256	401.19	0.278	-1.847	0.00198993	0.0410835	271.12	1.727	0.789	0.0368185	0.624294	656.38	1.676	0.745	0.116119	0.798725
CG34253	FBgn0085282	211.02	0.578	-0.791	0.00213083	0.0422433	168.17	1.171	0.227	0.53872	0.999991	81.34	1.303	0.382	0.247289	0.865531
CG34327	FBgn0085356	1410.8	0.424	-1.239	0.000656373	0.0190362	24.28	0.527	-0.923	0.365963	0.989519	0.65	0.178	-2.486	0.353658	0.898597
CG34382	FBgn0085411	10.23	0.017	-5.855	0.000363615	0.0129438	2.25	0.152	-2.72	0.385113	0.997586	3.34	55.746	5.801	0.000758931	0.187456
CG3457	FBgn0024984	9.59	30.497	4.931	0.00199135	0.0410835	0.75	0.139	-2.846	0.524724		2.64	4.081	2.029	0.258147	0.865531
CG3548	FBgn0035033	655.66	1.564	0.645	0.000493847	0.0159649	668.66	0.954	-0.068	0.789687	0.999991	148.36	1.05	0.07	0.849481	0.979762
CG3842	FBgn0029866	586.4	0.656	-0.608	0.0010581	0.0266956	515.21	1.112	0.153	0.663838	0.999991	235.7	0.747	-0.421	0.127364	0.800319
CG3918	FBgn0029873	1066.8	1.593	0.671	0.000735236	0.0204861	1209.28	1.236	0.305	0.234056	0.947642	276.65	1.543	0.626	0.142313	0.81475
CG4038	FBgn0011824	710.92	2.271	1.183	4.36058e-06	0.000493618	936.23	1.806	0.853	0.000303349	0.0424499	184.27	1.301	0.38	0.488275	0.918166
CG4115	FBgn0038017	169.15	0.375	-1.414	2.49904e-07	4.56275e-05	92.18	1.091	0.126	0.786517	0.999991	33.79	0.912	-0.132	0.695545	0.952602
CG4213	FBgn0031251	688.48	1.548	0.631	0.00259387	0.0482938	556.24	0.982	-0.027	0.94806	0.999991	86.48	0.866	-0.207	0.491686	0.918549
CG42232	FBgn0250754	2122.47	1.487	0.573	6.30137e-05	0.00363936	1990.52	0.845	-0.244	0.498779	0.999991	660.47	1.363	0.447	0.0456361	0.702785
CG42240	FBgn0250869	4923.23	1.501	0.586	6.4725e-06	0.000627931	4767.79	1.233	0.302	0.479217	0.999991	783.72	1.134	0.181	0.634546	0.938019
CG42258	FBgn0259143	7854.02	1.717	0.78	0.00211635	0.0421038	7718.19	1.172	0.229	0.594533	0.999991	1175.47	1.587	0.666	0.0889144	0.773704
CG42269	FBgn0259164	125.07	0.308	-1.698	7.94244e-08	1.83487e-05	44.72	1.8	0.848	0.348167	0.987822	10.42	1.665	0.736	0.296961	0.881361
CG42319	FBgn0259219	1536.85	1.572	0.652	5.87694e-05	0.00344699	2225.19	0.726	-0.461	0.0708264	0.784764	305.65	1.221	0.289	0.35438	0.898597
CG42323	FBgn0259223	48.56	0.321	-1.638	0.00264722	0.0489063	20.27	0.689	-0.538	0.511431	0.999991	30.89	17.579	4.136	9.47237e-05	0.0994362
CG42662	FBgn0261538	682.72	0.157	-2.674	4.86508e-09	1.96688e-06	533.68	0.743	-0.428	0.202666	0.927896	820.46	0.867	-0.205	0.847489	0.979762
CG42724	FBgn0261641	6638.41	1.442	0.528	9.09125e-06	0.000835742	8889.46	1.135	0.183	0.543486	0.999991	1687.26	1.101	0.139	0.65066	0.94191
CG42837	FBgn0262026	7830.27	0.562	-0.831	0.000696293	0.0197545	9053.43	1.001	0.001	0.997713	0.999991	6510.19	0.883	-0.18	0.589566	0.922223
CG42846	FBgn0262035	124.01	0.294	-1.767	0.000639	0.018704	174.81	0.714	-0.487	0.311932	0.9745	210.85	0.849	-0.236	0.529696	0.921322
CG43255	FBgn0262900	5.85	0.015	-6.066	0.00275243	0.049852	0					0
CG43347	FBgn0263072	3796.28	1.42	0.506	0.00243379	0.0462582	4143.21	0.954	-0.068	0.836725	0.999991	778.21	1.213	0.278	0.292164	0.880685
CG4363	FBgn0034663	12.28	126.738	6.986	0.00137564	0.0325099	0					0.17	0.705	-0.504	0.893657	0.979762
CG4364	FBgn0032138	10233.6	1.676	0.745	0.00248596	0.0470193	14135.5	1.085	0.118	0.743376	0.999991	2205.53	0.881	-0.182	0.404464	0.908332
CG43736	FBgn0263993	8386.76	1.41	0.496	0.00173634	0.0381658	8006.32	0.826	-0.275	0.356737	0.987822	1795.86	1.304	0.383	0.158901	0.82685
CG44098	FBgn0264907	935.89	1.474	0.559	0.000458478	0.0152198	818.13	0.971	-0.042	0.876484	0.999991	166.24	1.287	0.364	0.148882	0.820022
CG44247	FBgn0265182	7803.4	1.742	0.801	5.5716e-07	9.41351e-05	8948.17	0.947	-0.079	0.773927	0.999991	2260.78	1.101	0.139	0.476244	0.915226
CG44774	FBgn0266000	4382.13	1.465	0.551	0.00010631	0.00520967	4488.94	0.92	-0.121	0.648331	0.999991	1038.43	1.129	0.174	0.467596	0.915226
CG4577	FBgn0031306	6589.52	1.73	0.791	4.36054e-05	0.00272715	8878.66	1.04	0.057	0.822663	0.999991	3054.35	0.886	-0.175	0.351099	0.898076
CG46435	FBgn0286941	35.37	372.988	8.543	2.50984e-08	7.47669e-06	7.27	0.688	-0.54	0.814956	0.999991	6.44	0.018	-5.786	0.00576787	0.452271
CG4752	FBgn0034733	1128.45	0.443	-1.176	0.00017981	0.0076234	642.25	1.053	0.075	0.857383	0.999991	294.61	0.996	-0.006	0.983561	0.995505
CG4757	FBgn0027584	68.63	0.159	-2.653	1.05343e-09	4.76602e-07	98.85	1.744	0.802	0.0948383	0.811416	772.04	0.462	-1.114	0.304374	0.883497
CG4783	FBgn0038756	15.97	0.09	-3.472	0.000263457	0.010144	7.03	25.588	4.677	0.0142831	0.411033	3.77	61.654	5.946	0.0160168	0.582561
CG4822	FBgn0031220	335.48	1.849	0.887	0.0011524	0.0286079	631.36	1.484	0.569	0.164841	0.89323	412.28	0.978	-0.032	0.932068	0.984344
CG4847	FBgn0034229	5088.38	0.6	-0.738	0.00274212	0.0497448	6266.32	0.801	-0.32	0.19949	0.926898	3460.9	0.776	-0.367	0.0450842	0.698555
CG4995	FBgn0032219	107.97	0.305	-1.714	5.67699e-05	0.00338229	4.56	1.234	0.304	0.88666	0.999991	0.74	0.157	-2.67	0.296502	0.881361
CG5071	FBgn0039347	293.41	1.973	0.98	0.000642486	0.018704	324.92	1.156	0.209	0.542194	0.999991	66.28	0.901	-0.15	0.633374	0.938019
CG5151	FBgn0036576	2308.79	1.557	0.639	0.00026941	0.0103031	2978.78	1.335	0.417	0.0809322	0.790975	756.11	1.323	0.404	0.0119204	0.541961
CG5172	FBgn0030830	3193.97	0.236	-2.082	2.44186e-14	2.5129e-11	41.29	0.139	-2.845	0.0164121	0.43472	1.65	2.907	1.54	0.533499	0.921322
CG5225	FBgn0038468	8.05	0.022	-5.495	0.001825	0.0395009	0					0.58	0.461	-1.116	0.762044	0.970432
CG5287	FBgn0032477	507.02	0.622	-0.685	0.000171385	0.00740486	482.29	0.988	-0.017	0.966988	0.999991	210.77	0.793	-0.334	0.482105	0.915262
CG5445	FBgn0030838	2605.63	1.529	0.613	2.22754e-05	0.00159593	3276.05	1.068	0.095	0.763101	0.999991	821.1	1.163	0.218	0.335313	0.895837
CG5567	FBgn0036760	698.51	0.673	-0.571	0.00162348	0.0365363	693.72	0.957	-0.064	0.855118	0.999991	267.48	0.835	-0.26	0.317128	0.886827
CG5618	FBgn0036975	1559.9	0.653	-0.615	0.00033239	0.0119449	1610.23	1.764	0.819	0.0117991	0.36897	725.78	1.074	0.104	0.663471	0.946461
CG5789	FBgn0039207	1817.15	0.647	-0.628	0.000415313	0.0141986	1753.65	0.854	-0.228	0.441668	0.999991	776.02	0.875	-0.192	0.363029	0.900035
CG5800	FBgn0030855	519.28	1.576	0.656	0.00129066	0.0310015	839.67	1.842	0.882	0.00639218	0.268017	132.47	1.065	0.09	0.796609	0.975083
CG5867	FBgn0027586	4605.18	0.511	-0.968	8.56169e-15	9.69184e-12	3882.39	0.983	-0.025	0.941519	0.999991	2140.6	1.203	0.266	0.296315	0.881361
CG5885	FBgn0025700	2253.36	0.378	-1.405	0.00163017	0.0365416	1362.87	0.947	-0.078	0.808144	0.999991	811.87	1.028	0.039	0.895652	0.979762
CG5966	FBgn0029831	1079.47	2.115	1.081	0.000550004	0.0170576	514.4	0.63	-0.667	0.548211	0.999991	286.19	1.033	0.047	0.865284	0.979762
CG5986	FBgn0043455	851.6	1.547	0.63	0.00036596	0.0129458	935.93	1.338	0.42	0.220297	0.941794	182.05	1.169	0.225	0.582935	0.921322
CG6028	FBgn0038924	475.71	0.51	-0.971	1.40825e-07	2.94016e-05	421.53	1.002	0.002	0.994786	0.999991	190.68	0.848	-0.237	0.286463	0.876178
CG6040	FBgn0038679	1917.23	0.733	-0.447	0.00131294	0.0312894	1091.66	1.026	0.037	0.880039	0.999991	337.83	0.947	-0.079	0.660254	0.945246
CG6067	FBgn0029828	683.02	0.488	-1.035	5.46161e-06	0.000567206	1874.85	3.293	1.72	0.00157561	0.119265	822.95	0.745	-0.424	0.235884	0.86167
CG6115	FBgn0040985	7322.14	1.599	0.677	0.00192513	0.0404649	9088.37	1.043	0.061	0.906203	0.999991	1898.58	1.303	0.382	0.0770927	0.75452
CG6175	FBgn0036152	2106.89	1.643	0.716	1.74918e-07	3.47381e-05	2171.72	1.036	0.051	0.827403	0.999991	434.26	1.203	0.266	0.393326	0.907627
CG6230	FBgn0027582	869.1	0.627	-0.673	0.000496798	0.0159649	923.03	1.383	0.468	0.160484	0.890792	505.65	0.806	-0.311	0.298459	0.881361
CG6340	FBgn0030648	3238.69	1.464	0.55	0.002625	0.048713	3432.54	0.968	-0.047	0.868878	0.999991	674.28	1.107	0.147	0.642599	0.940821
CG6425	FBgn0039449	51.76	6.832	2.772	3.50934e-05	0.00229629	20.14	1.5	0.585	0.52451	0.999991	16.81	1.361	0.445	0.469755	0.915226
CG6675	FBgn0032973	122.79	0.31	-1.691	2.46464e-06	0.000319557	50.44	2.144	1.1	0.256267	0.953264	44.7	0.643	-0.636	0.25949	0.865531
CG6686	FBgn0032388	1693.85	1.429	0.515	0.000556973	0.0172266	1757.27	1.146	0.196	0.487647	0.999991	446.43	1.042	0.06	0.807195	0.979315
CG6770	FBgn0032400	27464.8	1.949	0.963	1.65672e-08	5.35831e-06	27102.4	0.864	-0.211	0.823504	0.999991	7259.7	1.593	0.672	0.17211	0.838043
CG6967	FBgn0034187	37.4	44.254	5.468	0.00199063	0.0410835	27.82	0.68	-0.556	0.580749	0.999991	15.25	0.769	-0.38	0.457629	0.915226
CG7011	FBgn0036489	134.11	0.512	-0.965	0.00190488	0.0402299	127.13	1.193	0.255	0.597367	0.999991	64.8	1.112	0.153	0.640191	0.940043
CG7054	FBgn0038972	254.6	0.382	-1.389	1.26545e-06	0.000186038	192.35	0.854	-0.228	0.480491	0.999991	109.34	0.846	-0.241	0.285372	0.876178
CG7079	FBgn0038849	145.84	0.391	-1.354	0.00113869	0.0283919	110.92	1.154	0.207	0.646326	0.999991	60.79	0.983	-0.025	0.932155	0.984354
CG7135	FBgn0030895	394.59	0.356	-1.488	9.57101e-10	4.51433e-07	314.03	1.131	0.178	0.659713	0.999991	164.23	0.719	-0.477	0.0659021	0.741951
CG7203	FBgn0031942	43111.4	0.284	-1.816	1.0656e-16	1.72323e-13	1307.36	0.586	-0.771	0.018471	0.468541	118.21	0.933	-0.1	0.818282	0.979762
CG7497	FBgn0036742	333.87	0.522	-0.938	0.00106376	0.0267001	235.82	0.871	-0.2	0.635597	0.999991	111.56	0.693	-0.528	0.0987137	0.788459
CG7567	FBgn0039670	15.11	0.052	-4.253	0.000964075	0.0248812	23.35	33.423	5.063	0.000227656	0.0339815	22.66	4.125	2.045	0.0359348	0.676989
CG7747	FBgn0034109	159.17	1.874	0.906	0.00250401	0.0471243	144.44	0.817	-0.291	0.584445	0.999991	37.28	1.062	0.087	0.860605	0.979762
CG7888	FBgn0036116	1635.83	0.693	-0.529	0.000159534	0.00702696	1305.18	1.14	0.189	0.497148	0.999991	504.1	0.773	-0.372	0.382577	0.906843
CG7896	FBgn0039728	271	0.467	-1.099	1.02252e-05	0.000890382	23.92	0.775	-0.367	0.663652	0.999991	9.14	1.523	0.607	0.36515	0.900691
CG8173	FBgn0030864	87.78	2.968	1.57	0.000176147	0.00749617	89.98	1.22	0.287	0.602791	0.999991	22.66	0.788	-0.344	0.481609	0.915262
CG8192	FBgn0034030	346.18	0.449	-1.154	0.00202539	0.0413102	53.56	0.508	-0.978	0.108786	0.819683	17.29	4.3	2.104	0.0294641	0.673505
CG8199	FBgn0037709	659.59	0.539	-0.891	0.000238253	0.00936469	602.61	1.403	0.489	0.117212	0.820253	210.27	0.866	-0.208	0.273342	0.87076
CG8675	FBgn0030834	365.56	1.689	0.756	0.000508083	0.0161896	370.51	1.244	0.315	0.347122	0.987822	62.16	0.854	-0.227	0.533661	0.921322
CG8736	FBgn0033308	13651.5	0.261	-1.936	3.56869e-22	2.01988e-18	33.68	0.464	-1.106	0.143381	0.860916	5.71	2.808	1.489	0.0796381	0.76271
CG8927	FBgn0038405	1753.32	0.344	-1.54	2.68632e-05	0.00187711	61.18	0.888	-0.171	0.790891	0.999991	22.42	4.537	2.182	0.0106228	0.530147
CG8963	FBgn0034181	4793.22	1.396	0.481	0.00166685	0.0369975	4995.19	1.041	0.058	0.843492	0.999991	1167.56	1.234	0.303	0.34287	0.897362
CG9220	FBgn0030662	471.85	0.519	-0.947	0.000160515	0.00704273	367.57	0.695	-0.524	0.086185	0.795812	142.06	1.183	0.243	0.217699	0.856764
CG9338	FBgn0032899	1222.89	0.708	-0.499	0.00146973	0.0341629	1350.99	1.113	0.155	0.585867	0.999991	451.45	0.882	-0.181	0.395164	0.908332
CG9400	FBgn0030562	278.19	0.533	-0.907	0.00073975	0.0204861	54.73	0.892	-0.165	0.809332	0.999991	22.13	1.288	0.365	0.487404	0.917076
CG9485	FBgn0034618	7062.37	0.482	-1.053	0.000135198	0.00631029	4419.99	0.761	-0.394	0.299335	0.971524	1111.67	0.57	-0.812	0.000615909	0.168665
CG9497	FBgn0031800	620.23	0.549	-0.866	0.000370481	0.013065	522.84	0.969	-0.046	0.874929	0.999991	200.94	0.941	-0.088	0.779208	0.971152
CG9512	FBgn0030593	22655.6	0.421	-1.249	0.00202805	0.0413102	11762.3	1.041	0.058	0.856154	0.999991	2114.27	0.894	-0.161	0.62269	0.933277
CG9572	FBgn0031089	2717.02	0.582	-0.781	0.000124441	0.00594378	1098.12	0.502	-0.993	0.000273507	0.0387583	264.91	0.962	-0.056	0.814683	0.979762
CG9631	FBgn0027563	508.51	0.453	-1.144	0.000100221	0.00499783	525.55	0.92	-0.121	0.721832	0.999991	400.87	0.62	-0.689	0.0478277	0.709814
CG9701	FBgn0036659	435.49	0.524	-0.933	0.000420108	0.0142384	493.61	1.54	0.623	0.220553	0.941794	248.21	1.078	0.109	0.561147	0.921322
CG9705	FBgn0036661	2153.2	1.622	0.698	7.38637e-05	0.00396274	2001.06	0.969	-0.045	0.904771	0.999991	379.04	2.16	1.111	0.025511	0.654932
CG9896	FBgn0034808	2120.16	0.73	-0.455	0.00157615	0.0358273	1974.99	0.975	-0.037	0.874782	0.999991	401.81	0.948	-0.078	0.578682	0.921322
chif	FBgn0000307	3034	1.423	0.509	0.000390418	0.0136445	3106.74	1.209	0.274	0.382105	0.997586	689.49	1.169	0.225	0.381784	0.906843
Cht2	FBgn0022702	626.19	0.659	-0.603	0.00207844	0.0419392	271.6	0.713	-0.488	0.253187	0.952961	97.31	0.903	-0.147	0.567411	0.921322
Cht5	FBgn0038180	759.49	0.366	-1.449	3.09383e-05	0.00210117	273.9	0.772	-0.373	0.230771	0.9448	138.45	1.101	0.139	0.621255	0.932882
Cht7	FBgn0035398	1508.48	0.405	-1.303	0.00220266	0.0432134	62.81	1.379	0.464	0.354248	0.987822	30.94	1.202	0.266	0.666094	0.947189
cic	FBgn0262582	5623.44	1.355	0.438	7.6517e-05	0.00402871	6128.39	1.07	0.098	0.672129	0.999991	1469.9	1.267	0.341	0.137947	0.812258
CNMa	FBgn0035282	358.74	7.018	2.811	7.25217e-09	2.83085e-06	529.1	1.536	0.619	0.133324	0.840374	170.26	1.693	0.76	0.000807502	0.191926
Cp190	FBgn0000283	4911.29	1.37	0.455	0.000491389	0.0159649	5080.05	1.074	0.103	0.717921	0.999991	1185.42	1.182	0.241	0.437565	0.913598
Cp38	FBgn0000360	7.58	0.011	-6.463	0.0025676	0.0478835	68.64	0.021	-5.578			0.74	1.255	0.328	0.892662	0.979762
Cpr100A	FBgn0039805	21055.3	0.387	-1.368	3.43764e-05	0.00226245	263.12	0.478	-1.066	0.000943465	0.0943043	53.05	2.941	1.556	0.0448051	0.69765
Cpr49Ab	FBgn0050042	93.99	0.139	-2.849	0.000174287	0.00747323	10.71	0.71	-0.494	0.77246	0.999991	1.03	0.496	-1.012	0.65096	0.942025
Cpr49Ah	FBgn0033731	20.04	0.061	-4.039	0.00103619	0.0263588	2.57	0.454	-1.141	0.652419	0.999991	4.05	2.037	1.027	0.574242	0.921322
Cpr62Bb	FBgn0035280	914.59	0.588	-0.765	0.000546391	0.0169922	237.19	0.582	-0.782	0.0288369	0.570405	37.09	0.774	-0.37	0.399118	0.908332
Cpr62Bc	FBgn0035281	4237.34	0.285	-1.809	4.64371e-06	0.000515361	37.25	0.599	-0.741	0.234666	0.947764	23.74	5.67	2.503	0.0331558	0.676989
Cpr64Aa	FBgn0035510	438.34	0.124	-3.011	7.97758e-09	3.01021e-06	2.45	0.308	-1.7	0.563822	0.999991	4.33	70.18	6.133	0.000755648	0.187456
Cpr76Bd	FBgn0036881	1156.9	0.325	-1.621	9.96656e-08	2.25643e-05	41.22	0.598	-0.742	0.216233	0.936069	10.23	2.587	1.371	0.206074	0.856764
Cpr92F	FBgn0038819	613.6	0.131	-2.933	3.16172e-17	5.96511e-14	7.82	3.197	1.677	0.248035	0.951021	8.53	6.855	2.777	0.07119	0.744498
Cpr97Ea	FBgn0039480	1092.4	0.201	-2.316	1.97174e-22	2.01988e-18	2.41	0.513	-0.963	0.667537	0.999991	5.59	91.549	6.516	0.00588811	0.452271
Cpr97Eb	FBgn0039481	1686.75	0.531	-0.913	3.52012e-09	1.47584e-06	56.05	0.345	-1.535	0.0175128	0.452784	11.29	0.822	-0.283	0.708959	0.957973
CRAT	FBgn0037440	907.89	0.605	-0.724	0.000316304	0.0115502	676.42	1.211	0.276	0.354138	0.987822	419.11	0.86	-0.218	0.452039	0.915226
CREG	FBgn0025456	309.01	0.594	-0.752	0.000735885	0.0204861	274.03	1.056	0.078	0.856096	0.999991	144.13	1.116	0.158	0.66391	0.946461
CROT	FBgn0039543	667.56	0.714	-0.486	0.00200458	0.0411084	388.54	1.271	0.346	0.260558	0.95537	184.86	0.984	-0.024	0.927267	0.982291
crp	FBgn0001994	2221.06	1.49	0.575	0.00111244	0.0277988	2628.01	1.078	0.108	0.685812	0.999991	715.76	1.371	0.455	0.0537502	0.720272
Crys	FBgn0005664	3235.74	0.404	-1.308	2.13896e-07	4.03631e-05	289.17	1.359	0.442	0.274631	0.961427	25.68	8.794	3.137	0.000172084	0.113765
csw	FBgn0000382	25133.4	1.392	0.477	0.00248804	0.0470193	25416.9	0.912	-0.133	0.667982	0.999991	5411.33	1.276	0.352	0.12701	0.799973
cup	FBgn0000392	327.56	8.272	3.048	0.000180522	0.00762504	80.77	0.19	-2.397	0.00911879	0.324079	20.81	0.88	-0.184	0.812713	0.979762
Cwc25	FBgn0031452	1376.16	1.768	0.822	0.00184715	0.039828	1366.76	1.109	0.15	0.758871	0.999991	234.65	1.311	0.39	0.334456	0.895638
CycA	FBgn0000404	482.13	7.176	2.843	9.06422e-05	0.00460121	135.9	0.621	-0.688	0.672635	0.999991	36.03	5.121	2.356	0.00121769	0.232413
CycB	FBgn0000405	898.99	8.577	3.101	3.40043e-06	0.000405188	120.24	0.207	-2.271			73.05	3.438	1.782	0.0219272	0.643572
CycB3	FBgn0015625	163.67	12.887	3.688	1.22528e-05	0.00104287	49.51	1.302	0.381	0.744562	0.999991	36.05	2.001	1	0.0360724	0.676989
CycE	FBgn0010382	257.96	3.999	2	0.00164563	0.0365982	72.43	0.727	-0.461	0.598501	0.999991	27.59	6.005	2.586	0.0198003	0.621571
CycT	FBgn0025455	4440.56	1.51	0.594	5.36966e-05	0.00323322	4843.3	1.319	0.399	0.112057	0.820253	1061.27	1.143	0.193	0.379972	0.906843
Cyp4ac3	FBgn0031695	158.48	2.17	1.118	0.0011636	0.0286486	149.99	1.337	0.419	0.29827	0.971524	87.38	0.776	-0.367	0.362346	0.900035
Cyp6a19	FBgn0033979	61.41	16.422	4.038	0.000137522	0.00635408	10.18	0.011	-6.561	0.0255739	0.551637	2.96	3.819	1.933	0.274012	0.871093
Cyp6a21	FBgn0033981	135.03	0.475	-1.073	0.000517249	0.0163318	96.11	2.628	1.394	0.00742287	0.292551	72.96	1.427	0.513	0.168736	0.835769
Cyp6t3	FBgn0033697	17.54	43.867	5.455	7.62133e-05	0.00402871	24.44	0.861	-0.216	0.837974	0.999991	22.54	1.155	0.207	0.628937	0.937378
Cyt-c-p	FBgn0284248	24274.5	0.723	-0.468	0.000857043	0.0228202	12084.4	1.146	0.196	0.356442	0.987822	2340.66	1.177	0.235	0.176401	0.838043
dah	FBgn0015926	29.48	84.364	6.399	0.00188412	0.0401182	4.94	0.384	-1.382	0.576927	0.999991	2.85	12.232	3.613	0.0254635	0.654932
DAT	FBgn0034136	124.69	0.452	-1.146	0.00129812	0.0310015	135.52	0.782	-0.355	0.467272	0.999991	31.43	1.238	0.309	0.628867	0.937378
Dcp-1	FBgn0010501	336.44	1.724	0.786	0.00260687	0.0484561	232.54	1.405	0.491	0.275959	0.962117	72.9	0.965	-0.051	0.902088	0.979762
del	FBgn0086251	184.28	3.342	1.741	2.00848e-05	0.00147636	127.46	0.676	-0.566	0.373535	0.993889	41.32	1.053	0.075	0.822709	0.979762
deltaCOP	FBgn0028969	1118.75	0.677	-0.563	0.000330924	0.0119301	1185.07	0.782	-0.354	0.333877	0.984536	489.09	0.918	-0.124	0.503486	0.921322
Dgat2	FBgn0033215	8.29	0.036	-4.779	0.00184448	0.039828	2.74	6.138	2.618	0.267048	0.956365	3.38	0.682	-0.553	0.760462	0.970432
dgt1	FBgn0039710	296.82	1.983	0.988	0.000216258	0.00865033	277.68	0.747	-0.42	0.229111	0.943586	90.81	1.026	0.037	0.873525	0.979762
dhd	FBgn0011761	325.7	12.223	3.612	0.000115959	0.00563372	37.82	0	-21.946			10.76	31.756	4.989	0.000884292	0.195553
DIP1	FBgn0024807	30277.3	1.447	0.533	5.22826e-06	0.000567206	33119.6	0.833	-0.264	0.287361	0.967705	7273.85	1.127	0.172	0.49876	0.919222
disco	FBgn0000459	606.14	1.871	0.904	2.13939e-07	4.03631e-05	1063.53	1.491	0.577	0.0292474	0.574026	298.02	1.375	0.46	0.136036	0.810879
dob	FBgn0030607	1192.99	2.236	1.161	0.000401552	0.0139435	2660.3	1.257	0.33	0.323043	0.978326	730.36	1.15	0.201	0.738934	0.969014
dpr17	FBgn0051361	914.1	1.405	0.49	0.00225955	0.0437981	905.59	0.966	-0.05	0.885463	0.999991	159.32	1.076	0.105	0.670915	0.948014
DptA	FBgn0004240	543.7	3.949	1.981	1.92653e-05	0.00144426	1719.65	0.681	-0.555	0.156273	0.88469	1945.46	0.709	-0.496	0.544548	0.921322
dre4	FBgn0002183	1288.86	1.343	0.425	0.00267151	0.0491309	1351.25	1.018	0.025	0.93291	0.999991	392.37	1.011	0.015	0.942029	0.985164
Drs	FBgn0283461	2094.94	0.195	-2.356	6.19469e-07	0.000103123	1854.92	0.346	-1.531	0.00175605	0.122906	5031.6	0.622	-0.686	0.592728	0.924313
Drsl4	FBgn0052282	135.43	0.343	-1.544	6.95598e-05	0.00384783	221.44	1.307	0.386	0.484665	0.999991	73.96	0.721	-0.473	0.115764	0.798725
Dtg	FBgn0038071	126.54	0.296	-1.758	5.42418e-06	0.000567206	132.59	1.029	0.041	0.928622	0.999991	75.55	1.962	0.972	0.0585819	0.729676
Duox	FBgn0283531	1052.62	0.561	-0.834	5.4305e-08	1.43548e-05	282.38	1.06	0.085	0.796597	0.999991	70	1.201	0.264	0.327972	0.892269
e	FBgn0000527	1688.04	0.305	-1.711	2.23949e-07	4.15591e-05	669.07	0.971	-0.043	0.897439	0.999991	259.77	1.05	0.071	0.764768	0.970432
E(Pc)	FBgn0000581	3290.07	1.389	0.474	0.000814702	0.0220632	3213.55	0.949	-0.075	0.745384	0.999991	977.54	1.112	0.153	0.463897	0.915226
E2f1	FBgn0011766	3795.83	1.512	0.596	0.0015963	0.0362127	3756.09	1.133	0.181	0.525215	0.999991	977.06	1.54	0.623	0.0708999	0.744498
ear	FBgn0026441	1789.91	1.666	0.736	9.00719e-06	0.000835742	1819.28	1.05	0.07	0.846526	0.999991	347.88	1.324	0.405	0.249274	0.865531
eca	FBgn0069242	754.47	0.58	-0.787	5.80849e-05	0.00342459	804.01	1.396	0.481	0.0955089	0.811416	346.92	1.003	0.005	0.986381	0.996292
Echs1	FBgn0033879	1751.04	0.529	-0.92	0.000287541	0.0108499	1540.43	0.738	-0.438	0.157699	0.887364	945.43	0.882	-0.182	0.473337	0.915226
ect	FBgn0000451	747.42	1.539	0.622	0.000154402	0.00692052	227.82	1.481	0.567	0.167394	0.89463	39.78	1.047	0.067	0.940376	0.9848
Edc3	FBgn0036735	1633.2	1.827	0.87	3.5758e-10	1.83991e-07	1778.11	1.067	0.094	0.843963	0.999991	519	1.332	0.413	0.0901988	0.774439
Efr	FBgn0029849	639.7	0.519	-0.947	0.000569628	0.01757	748.62	1.181	0.24	0.528006	0.999991	281.22	0.682	-0.552	0.0934456	0.783577
Eglp4	FBgn0034885	5167.76	0.552	-0.856	0.000955281	0.0247455	5560.54	0.981	-0.028	0.941146	0.999991	5578.34	0.874	-0.194	0.56062	0.921322
Egm	FBgn0086712	417.67	0.665	-0.588	0.00202902	0.0413102	435.26	0.925	-0.112	0.731083	0.999991	189.6	0.919	-0.122	0.744094	0.970432
eIF3c	FBgn0034258	9888.98	1.493	0.578	1.79211e-06	0.000250453	11445.1	1.049	0.069	0.781856	0.999991	2714.67	1.177	0.235	0.336588	0.895837
Eno	FBgn0000579	31917.7	0.642	-0.639	0.00121899	0.0296753	22333	0.719	-0.476	0.121973	0.823574	10398	0.852	-0.231	0.249093	0.865531
epsilonTry	FBgn0010425	133.44	0.038	-4.735	8.12376e-06	0.000772781	0.09	0.544	-0.879	0.846751		12.2	5.415	2.437	0.00173886	0.263909
ERp60	FBgn0033663	8419.24	0.59	-0.761	0.00145929	0.03406	8050.08	1.08	0.112	0.729342	0.999991	3741.88	1.074	0.103	0.619825	0.932421
Est-Q	FBgn0037090	273.19	0.345	-1.536	0.00236681	0.0451804	327.04	1.156	0.209	0.576257	0.999991	215.56	0.75	-0.414	0.345064	0.897362
Etf-QO	FBgn0286783	2656.38	0.705	-0.504	0.000709113	0.0200178	2465.36	1.251	0.323	0.256007	0.95311	1157.76	0.99	-0.014	0.935942	0.984792
exp	FBgn0033668	794.61	0.513	-0.962	0.000196785	0.00812412	202.28	1.16	0.214	0.576745	0.999991	42.54	1.24	0.31	0.419085	0.908541
Fancd2	FBgn0038827	49.57	4.533	2.18	5.39385e-06	0.000567206	26.18	0.481	-1.056	0.212383	0.9346	15.29	1.54	0.623	0.248047	0.865531
fat-spondin	FBgn0026721	3676.75	0.555	-0.849	0.00034653	0.0123745	4058.6	1.161	0.216	0.562339	0.999991	2506.19	0.724	-0.466	0.11707	0.798725
Fdh	FBgn0011768	752.28	0.584	-0.777	0.00192921	0.0404649	637.32	1.009	0.013	0.974451	0.999991	462.09	0.755	-0.405	0.167917	0.835769
feo	FBgn0030241	123.83	8.76	3.131	0.000200415	0.00819023	23.89	0.58	-0.786	0.423086	0.999991	16.82	4.134	2.047	0.0369227	0.676989
fid	FBgn0259146	1889.55	1.324	0.404	0.00171733	0.0378214	1749.63	0.923	-0.116	0.621394	0.999991	371.76	0.956	-0.065	0.758291	0.970432
fln	FBgn0005633	757.82	0.024	-5.407	0.00121226	0.0296387	2.85	1.473	0.558	0.76816	0.999991	1.56	12.613	3.657	0.151403	0.820022
Fmo-1	FBgn0034943	466.33	0.423	-1.242	1.06362e-05	0.000919101	304.41	1.019	0.027	0.942295	0.999991	107.53	1.581	0.66	0.0458562	0.704413
fs(1)h	FBgn0004656	7945.78	1.49	0.575	1.82765e-06	0.000252305	8561.44	0.984	-0.024	0.923989	0.999991	2030.38	1.338	0.42	0.0911263	0.77667
fs(1)Ya	FBgn0000927	77.46	26.756	4.742	0.0018159	0.0393792	6.26	0.017	-5.863	0.06775	0.767245	7.12	20.41	4.351	0.0349689	0.676989
Fst	FBgn0037724	312.47	73.75	6.205	0.000105156	0.00517552	3.79	0.559	-0.839	0.683677	0.999991	9.54	7.73	2.951	0.0331927	0.676989
ft	FBgn0001075	256	0.594	-0.752	0.00225905	0.0437981	81.61	0.728	-0.458	0.452474	0.999991	24.61	1.923	0.943	0.0247318	0.654932
ftz-f1	FBgn0001078	2574.23	1.399	0.484	0.000464097	0.0153166	2381.34	1.274	0.35	0.207691	0.930751	469.07	1.21	0.276	0.356353	0.898597
Fum1	FBgn0286222	6634.21	0.662	-0.596	0.000663236	0.0191526	3772.17	0.761	-0.394	0.148158	0.871178	1383.43	0.99	-0.015	0.937223	0.984792
fusl	FBgn0031702	884.38	0.499	-1.004	1.09467e-09	4.76602e-07	958.88	0.562	-0.832	0.00315254	0.176464	522.73	0.791	-0.339	0.178244	0.839377
fw	FBgn0001083	639.73	0.594	-0.752	0.00210645	0.0420547	309.25	0.731	-0.453	0.127066	0.831807	68.45	0.975	-0.037	0.934441	0.984513
g	FBgn0001087	4299.42	1.281	0.357	0.00272028	0.0496607	4643.5	1.08	0.111	0.747531	0.999991	1013.04	1.111	0.152	0.645757	0.941402
G9a	FBgn0040372	1291.08	1.423	0.508	0.00225022	0.0437981	1254.91	1.032	0.045	0.905585	0.999991	341.31	0.983	-0.024	0.870006	0.979762
Gale	FBgn0035147	1197.02	0.451	-1.149	0.000152785	0.00692052	1230.08	0.949	-0.075	0.816141	0.999991	733.8	0.801	-0.319	0.267284	0.868985
garz	FBgn0264560	1865	0.69	-0.534	0.000281534	0.0106945	1921.27	1.028	0.039	0.889947	0.999991	777.67	0.846	-0.241	0.204908	0.856764
GCS2alpha	FBgn0027588	8922.25	0.721	-0.472	6.37683e-05	0.00366425	8879.79	0.782	-0.356	0.126839	0.831807	3450.63	0.889	-0.17	0.378176	0.906809
Gfat1	FBgn0027341	2914.16	0.579	-0.789	6.69059e-05	0.00378687	1028.41	1.019	0.027	0.916511	0.999991	340.8	0.955	-0.067	0.811032	0.979762
Glo1	FBgn0283450	521.71	0.406	-1.299	4.27071e-12	3.22296e-09	603.13	0.939	-0.091	0.78417	0.999991	313.06	0.823	-0.281	0.298397	0.881361
glu	FBgn0015391	541.78	1.57	0.651	0.000415514	0.0141986	397.66	0.917	-0.124	0.720211	0.999991	102.62	1.413	0.498	0.117717	0.798725
GluProRS	FBgn0005674	1944.57	0.6	-0.736	2.92794e-05	0.00200874	2056.12	1.256	0.329	0.303201	0.972244	756.38	0.892	-0.166	0.203236	0.856764
GlyS	FBgn0266064	7482.4	0.508	-0.977	5.7644e-05	0.00341639	3788.15	0.707	-0.501	0.0865832	0.795812	1094.3	0.79	-0.341	0.103327	0.793766
GNBP-like3	FBgn0034511	738.26	0.286	-1.806	0.000683396	0.0195355	799.92	0.554	-0.852	0.144903	0.865403	2023.21	0.456	-1.132	0.315264	0.886827
GNBP1	FBgn0040323	305.06	0.614	-0.705	0.00215761	0.0424963	367.23	1.233	0.303	0.401403	0.999991	202.44	0.83	-0.269	0.267799	0.869069
Gnpnat	FBgn0039690	603.26	0.507	-0.979	0.000260218	0.0100535	502.3	0.791	-0.338	0.265759	0.956365	240.91	0.763	-0.391	0.233332	0.86167
gnu	FBgn0001120	68.97	11.741	3.553	0.000821085	0.0220926	13.65	0.022	-5.517	0.00563239	0.257366	4.76	20.529	4.36	0.0422272	0.694714
Gpat4	FBgn0034971	863.34	1.532	0.616	0.000496512	0.0159649	1035.67	1.593	0.671	0.0176131	0.453494	360.22	0.899	-0.153	0.334896	0.895687
Gr64c	FBgn0045477	6.31	65.715	6.038	0.0022793	0.0439138	4.77	0.199	-2.328	0.422967	0.999991	1.5	0.078	-3.684	0.184767	0.845574
Grasp65	FBgn0036919	1304.97	0.543	-0.88	0.00169971	0.0375577	1065.68	0.943	-0.084	0.817046	0.999991	658.95	0.807	-0.31	0.293364	0.881361
grass	FBgn0039494	212.41	0.312	-1.681	0.000686435	0.0195729	181.05	0.893	-0.163	0.751743	0.999991	85.03	0.617	-0.697	0.0958162	0.7852
GstE14	FBgn0033817	351.62	0.623	-0.682	0.000694904	0.0197545	353.4	1.085	0.117	0.701761	0.999991	108.25	0.917	-0.125	0.814297	0.979762
GstS1	FBgn0010226	2291.39	0.421	-1.248	3.40863e-05	0.00225647	1748.5	0.96	-0.059	0.819945	0.999991	985.48	0.869	-0.202	0.541911	0.921322
Gtp-bp	FBgn0010391	1556.82	0.677	-0.562	0.00104352	0.0264266	1511.8	0.928	-0.107	0.770471	0.999991	592.1	0.996	-0.006	0.974439	0.992017
Gug	FBgn0010825	4947.5	1.308	0.387	0.00129807	0.0310015	4565.07	0.898	-0.156	0.528281	0.999991	1289.05	1.276	0.352	0.139693	0.81475
gwl	FBgn0260399	83.99	7.911	2.984	2.63544e-06	0.00033148	12.93	0.045	-4.466	0.00886998	0.321357	9.79	21.011	4.393	0.00106139	0.221318
hang	FBgn0026575	5494.52	1.634	0.708	3.96543e-06	0.000453421	6263.9	1.4	0.485	0.0604249	0.740706	1023.13	1.289	0.366	0.270211	0.869069
hfp	FBgn0028577	5649.99	1.376	0.461	0.000858782	0.0228202	7689.52	1.006	0.009	0.969418	0.999991	2043.43	1.018	0.026	0.883442	0.979762
HmgD	FBgn0004362	2994.19	2.197	1.136	5.4528e-08	1.43548e-05	3444.04	1.062	0.087	0.814638	0.999991	1016.14	2.655	1.409	0.0829579	0.767269
HP1D3csd	FBgn0030994	13.44	0.013	-6.252	0.000232821	0.00921517	1.24	8.596	3.104	0.368825		5.79	2.514	1.33	0.157081	0.825466
hpRNA:CR18854	FBgn0285991	5124.55	0.75	-0.415	0.00273931	0.0497448	3823.94	1.06	0.084	0.750859	0.999991	1370.39	0.914	-0.13	0.607961	0.93071
hrg	FBgn0015949	4075.33	1.456	0.542	2.76041e-06	0.00033965	4742.49	1.132	0.179	0.493083	0.999991	1187.3	1.297	0.375	0.100003	0.791755
Hsp26	FBgn0001225	258.6	4.31	2.108	0.000199729	0.00819023	132.19	1.005	0.008	0.992246	0.999991	177.47	0.256	-1.964	0.00839476	0.494153
Hsp27	FBgn0001226	1309.89	4.061	2.022	6.82779e-05	0.00384389	600.62	0.714	-0.486	0.710894	0.999991	598.73	4.538	2.182	0.116903	0.798725
Hsp60A	FBgn0015245	7656.45	0.73	-0.454	0.000509144	0.0161896	9268.81	1.109	0.149	0.680544	0.999991	2727.99	0.909	-0.138	0.480155	0.915262
Ilp6	FBgn0044047	3301.18	1.744	0.802	1.16298e-08	4.11403e-06	4451.04	1.33	0.411	0.239233	0.949826	1372.22	1.479	0.564	0.118433	0.798725
Imp	FBgn0285926	4565.65	1.701	0.766	0.00126968	0.0307111	5721.83	1.332	0.414	0.366861	0.989519	1166.36	1.545	0.628	0.0764277	0.754253
IMPPP	FBgn0283462	110.79	0.001	-10.305	2.93302e-16	4.15022e-13	75.66	0.426	-1.232	0.767625	0.999991	781.78	0.129	-2.96	0.395727	0.908332
inaF-D	FBgn0260812	728.05	3.038	1.603	8.06456e-07	0.000126793	994.97	0.677	-0.563	0.733287	0.999991	39.52	0.809	-0.306	0.51309	0.921322
Incenp	FBgn0260991	108.19	11.056	3.467	0.000758884	0.0209016	12.42	1.096	0.133	0.925542	0.999991	14.08	2.908	1.54	0.0790841	0.760779
InR	FBgn0283499	1984.97	1.722	0.784	1.43544e-06	0.000208323	2089.89	1.164	0.22	0.63597	0.999991	510.02	1.055	0.078	0.741549	0.970432
insv	FBgn0031434	131.39	3.282	1.715	1.98995e-05	0.0014723	134.32	0.636	-0.654	0.0811134	0.790975	59.1	1.235	0.305	0.280705	0.875754
Ipk1	FBgn0050295	217.09	2.168	1.116	1.67421e-05	0.00130691	304.92	0.699	-0.516	0.216563	0.936069	206.39	0.823	-0.282	0.265648	0.868985
Jheh2	FBgn0034405	1399.11	0.654	-0.614	0.00271442	0.0496401	1610.09	0.79	-0.341	0.129143	0.835216	713.04	0.996	-0.006	0.966262	0.989433
Jon65Aii	FBgn0035666	37.25	0.095	-3.393	0.00209214	0.0419558	0.19	0.389	-1.363	0.763805		1.08	0.21	-2.25	0.374892	0.904432
jumu	FBgn0015396	243.05	2.629	1.394	0.000135459	0.00631029	294.76	1.093	0.129	0.780974	0.999991	66.1	1.488	0.574	0.31191	0.886524
kin17	FBgn0024887	269.05	1.944	0.959	0.000417383	0.0141986	249.86	1.806	0.853	0.0525934	0.701785	69.07	2.004	1.003	0.00487754	0.419901
kkv	FBgn0001311	953.21	0.262	-1.931	8.16105e-19	2.30958e-15	40.54	1.31	0.389	0.588779	0.999991	16.03	0.714	-0.486	0.601867	0.928718
Klp10A	FBgn0030268	3015.87	1.403	0.489	0.000365246	0.0129458	2685.06	0.993	-0.01	0.970259	0.999991	586.2	1.283	0.359	0.164323	0.83534
Klp61F	FBgn0004378	81.07	11.748	3.554	9.15477e-06	0.000835742	16.28	1.238	0.308	0.799912	0.999991	10.9	3.521	1.816	0.0439119	0.696673
l(1)G0004	FBgn0027334	886.32	1.857	0.893	0.00121545	0.0296529	1365.99	1.553	0.635	0.0325078	0.595621	332.6	1.051	0.072	0.758022	0.970432
l(2)34Fc	FBgn0261534	540.42	0.41	-1.285	1.63598e-05	0.00128606	120.27	0.504	-0.99	0.0640585	0.756471	25.55	0.746	-0.423	0.439991	0.913861
l(3)psg2	FBgn0035617	1217.98	1.435	0.521	0.000195287	0.00812412	1317.29	1.047	0.067	0.819632	0.999991	322.7	1.262	0.336	0.296553	0.881361
L2HGDH	FBgn0032729	1086.9	0.639	-0.647	0.00177287	0.0387431	868.98	0.893	-0.164	0.617943	0.999991	437.98	0.838	-0.255	0.253041	0.865531
Ldsdh1	FBgn0029994	5142.94	0.653	-0.614	4.5991e-05	0.00282944	3913.38	0.953	-0.069	0.821126	0.999991	1348.7	0.745	-0.424	0.17393	0.838043
Lerp	FBgn0051072	2637.11	1.464	0.55	3.87588e-05	0.00247881	2826.82	0.828	-0.273	0.254948	0.95311	766.35	1.009	0.013	0.950109	0.986774
lft	FBgn0032230	170.54	0.504	-0.988	0.000741987	0.0204861	175.7	1.19	0.251	0.539739	0.999991	55.98	1.355	0.438	0.256107	0.865531
Lk6	FBgn0017581	62586	1.721	0.783	2.5654e-05	0.00180375	103456	1.141	0.19	0.575313	0.999991	23298	1.201	0.264	0.268404	0.869069
LKRSDH	FBgn0286198	887.33	0.442	-1.178	0.000155284	0.00692052	1312.13	3.348	1.743	0.000986344	0.0960184	511.12	0.771	-0.375	0.285923	0.876178
lmgA	FBgn0250903	24.88	0.004	-8.15	0.000621567	0.018565	36.35	0.266	-1.91	0.592974	0.999991	10.67	0.603	-0.731	0.668667	0.94756
lncRNA:CR30055	FBgn0050055	613.2	1.774	0.827	0.000153594	0.00692052	583.65	1.098	0.135	0.711807	0.999991	126.38	1.395	0.48	0.119783	0.798725
lncRNA:CR33942	FBgn0062961	61.02	0.181	-2.465	2.02923e-08	6.20836e-06	97.7	1.589	0.668	0.165742	0.89323	27.16	1.051	0.071	0.916298	0.979762
lncRNA:CR43253	FBgn0262898	7.56	79.165	6.307	0.00250608	0.0471243	6.18	0.875	-0.193	0.916093	0.999991	2.71	0.931	-0.103	0.938998	0.9848
lncRNA:CR43904	FBgn0264505	11.99	125.992	6.977	7.97004e-05	0.00415764	0.57	7.688	2.943	0.504678		0
lncRNA:CR44773	FBgn0265999	7.96	83.297	6.38	0.0021958	0.0431536	7.02	0.015	-6.037	0.00591853	0.262404	1.51	24.539	4.617	0.0498573	0.71213
lncRNA:CR44828	FBgn0266086	14.06	147.72	7.207	8.12665e-05	0.00421989	12.78	0.418	-1.258	0.300689	0.971524	0.62	10.283	3.362	0.360389	0.899866
lncRNA:CR45223	FBgn0266750	91.7	3.105	1.635	0.000458217	0.0152198	116.5	1.143	0.192	0.807262	0.999991	20.06	0.841	-0.251	0.572777	0.921322
lncRNA:CR45533	FBgn0267089	178.03	3.175	1.667	0.000107572	0.00524878	333.02	1.366	0.45	0.298044	0.971524	60.32	1.005	0.007	0.983663	0.995505
lncRNA:noe	FBgn0026197	12197.2	1.843	0.882	3.37423e-05	0.00224684	24318.3	1.405	0.491	0.106406	0.819683	4610.56	0.98	-0.03	0.906174	0.979762
lncRNA:roX1	FBgn0019661	81.48	4.956	2.309	0.000671767	0.0193005	191.14	0.755	-0.405	0.501289	0.999991	119.03	2.549	1.35	0.0151731	0.576904
loj	FBgn0061492	367.55	0.522	-0.937	3.58194e-05	0.00233032	384.32	1.535	0.618	0.0616254	0.74745	237.52	1.019	0.027	0.93397	0.984376
lok	FBgn0019686	151.05	4.505	2.171	0.000497795	0.0159649	84.65	0.954	-0.067	0.899225	0.999991	45.57	1.178	0.237	0.503922	0.921322
Lsd-2	FBgn0030608	10560.3	1.885	0.914	7.61375e-07	0.000121391	14231.2	2.096	1.068	9.6735e-07	0.000624129	2852.86	1.236	0.306	0.172321	0.838043
Lsp1alpha	FBgn0002562	11.61	0.007	-7.073	9.8306e-05	0.00494588	18.62	3.795	1.924	0.140272	0.852061	952.89	19.592	4.292	0.0691606	0.744498
LysD	FBgn0004427	424.73	0.034	-4.868	0.000122365	0.00589433	42.82	0.122	-3.039	0.0246027	0.5412	180.19	9.107	3.187	0.00729202	0.479889
m	FBgn0002577	12.06	126.578	6.984	2.2109e-05	0.0015941	4.54	0.448	-1.158	0.567247	0.999991	1.97	0.851	-0.233	0.890714	0.979762
mad2	FBgn0035640	45.42	10.724	3.423	0.000301205	0.0111426	16.47	0.643	-0.636	0.600157	0.999991	13.91	1.856	0.892	0.129635	0.801908
Mal-A1	FBgn0002570	904.63	16.768	4.068	0.00200112	0.0411084	59.18	0.264	-1.922	0.00948089	0.32956	54.28	2.907	1.539	0.00424686	0.39628
Mal-A6	FBgn0050360	120.29	11.964	3.581	5.28138e-06	0.000567206	21.14	0.503	-0.99	0.226631	0.94244	13.56	1.521	0.605	0.453853	0.915226
Mal-A7	FBgn0033296	133.9	246.384	7.945	0.00138812	0.0327366	0.19	0.389	-1.363	0.763805		1.32	0.194	-2.368	0.32578	0.891332
Mal-A8	FBgn0033297	70.02	34.89	5.125	0.000183615	0.00769823	0					0.67	0.566	-0.822	0.777167	0.97067
Max	FBgn0017578	698.66	1.65	0.722	0.000414793	0.0141986	787.88	1.324	0.405	0.290948	0.970548	161.82	1.238	0.307	0.404451	0.908332
Mbs	FBgn0005536	8425.02	1.424	0.51	0.00116417	0.0286486	8561.38	1.024	0.034	0.905412	0.999991	1626.36	1.054	0.075	0.723446	0.96359
MCPH1	FBgn0260959	1082.75	1.764	0.819	0.000937088	0.0244217	897.71	0.987	-0.019	0.957793	0.999991	326.23	1.356	0.439	0.255328	0.865531
MED31	FBgn0037262	1287.82	1.7	0.766	0.000161448	0.00705633	1234.05	1.077	0.106	0.719774	0.999991	357.89	1.26	0.333	0.184356	0.845221
meigo	FBgn0250820	352.28	0.488	-1.035	0.000400446	0.0139435	346.42	1.466	0.552	0.159896	0.890792	199.46	0.803	-0.317	0.380014	0.906843
MFS9	FBgn0038799	928.4	0.501	-0.996	1.39847e-08	4.78871e-06	653.16	1.658	0.729	0.139958	0.851493	336.41	0.854	-0.228	0.327794	0.892269
Mink	FBgn0039250	55.15	4.37	2.128	0.00147351	0.0341805	40.86	1.001	0.002	0.998128	0.999991	14.97	0.959	-0.061	0.91458	0.979762
mmy	FBgn0259749	2193.88	0.739	-0.437	0.00207639	0.0419392	2048.15	0.804	-0.315	0.266331	0.956365	737.25	0.685	-0.545	0.0486131	0.710381
Mnt	FBgn0023215	3849.54	1.789	0.839	0.000159179	0.00702696	3673.84	1.24	0.31	0.385252	0.997586	808.89	1.787	0.837	0.0919488	0.779461
Moca-cyp	FBgn0039581	3562.09	1.531	0.614	2.47334e-06	0.000319557	4435.94	0.912	-0.133	0.619168	0.999991	1058.43	1.215	0.281	0.307203	0.883539
mor	FBgn0002783	2480.32	1.405	0.49	0.000257578	0.00998555	2435.75	1.017	0.024	0.925897	0.999991	662.37	1.185	0.244	0.423889	0.90945
mRRF2	FBgn0051159	284.35	0.638	-0.649	0.00200023	0.0411084	222.76	1.014	0.02	0.962423	0.999991	60.54	0.732	-0.451	0.303638	0.883354
mrt	FBgn0039507	2069.24	1.354	0.437	0.000600006	0.0181606	2502.6	1.157	0.21	0.53205	0.999991	422.94	1.234	0.303	0.250943	0.865531
Msh6	FBgn0036486	182.98	3.179	1.669	2.11232e-07	4.03631e-05	160.22	0.529	-0.918	0.0360292	0.623904	42.8	0.645	-0.633	0.0932086	0.782766
mthl2	FBgn0035623	327.29	0.556	-0.847	3.87564e-05	0.00247881	259.33	1.201	0.264	0.526974	0.999991	104.86	0.82	-0.287	0.650437	0.941788
Mtpalpha	FBgn0028479	3954.5	0.743	-0.429	0.000295265	0.011031	3529.22	1.103	0.142	0.620633	0.999991	1438.3	1.06	0.084	0.617779	0.932379
Muc12Ea	FBgn0052602	367.18	9.755	3.286	2.94048e-08	8.53492e-06	266.32	0.596	-0.747	0.0774996	0.787891	85.9	1.256	0.328	0.500969	0.921089
Muc30E	FBgn0053300	943.24	4.117	2.042	1.62157e-05	0.00128365	828.79	1.518	0.602	0.609769	0.999991	99.74	1.959	0.97	0.055114	0.720387
Myc	FBgn0262656	4116.8	2.226	1.155	0.000189003	0.00789487	6562.73	1.769	0.823	0.0788107	0.787891	1320.84	1.243	0.313	0.125013	0.799973
Mys45A	FBgn0033379	2267.87	1.602	0.68	0.000104608	0.00517288	4270.22	2.204	1.14	0.000512975	0.0652586	410.21	1.054	0.075	0.835911	0.979762
NAAT1	FBgn0029762	285.9	0.606	-0.723	0.002495	0.0470723	596.05	0.926	-0.11	0.658989	0.999991	376.57	0.901	-0.15	0.633385	0.938019
Ncoa6	FBgn0031698	3890.67	1.502	0.587	3.32196e-06	0.000400048	4094.03	0.979	-0.031	0.885271	0.999991	1054.84	1.302	0.381	0.223042	0.856764
ND-20	FBgn0030718	2709.24	0.757	-0.401	0.00193913	0.0405	1974.39	0.677	-0.563	0.030925	0.586699	738.8	0.807	-0.31	0.321395	0.888088
ND-PDSW	FBgn0021967	6633.3	0.611	-0.711	0.00174769	0.0382666	4103.09	0.646	-0.631	0.0358493	0.623892	1419.83	0.897	-0.157	0.523625	0.921322
Ndg	FBgn0026403	2404.74	0.528	-0.921	1.32581e-05	0.00109548	2870.87	1.275	0.35	0.274897	0.961427	1560.97	1.162	0.217	0.424792	0.90945
nemy	FBgn0261673	671.05	0.629	-0.668	0.000606743	0.0182387	569.61	0.989	-0.017	0.961858	0.999991	162.38	1.166	0.221	0.294561	0.881361
Nepl18	FBgn0039611	571.23	0.34	-1.555	6.41791e-06	0.000627931	1026.78	1.742	0.8	0.0079736	0.304657	671.34	1.035	0.05	0.892185	0.979762
ninaB	FBgn0002937	963.83	0.614	-0.704	0.000104646	0.00517288	1172.83	0.986	-0.02	0.96087	0.999991	314.32	0.83	-0.269	0.505954	0.921322
ninaE	FBgn0002940	421227	1.492	0.577	8.62416e-06	0.000806822	766039	1.212	0.277	0.354506	0.987822	226988	0.929	-0.106	0.536782	0.921322
nkd	FBgn0002945	813.6	1.435	0.521	0.00214807	0.0424963	727.96	1.055	0.078	0.80019	0.999991	206.54	1.192	0.253	0.57293	0.921322
Non1	FBgn0028473	9525.17	2.203	1.14	0.00255703	0.047844	14175.8	0.9	-0.151	0.662156	0.999991	3449.82	0.838	-0.254	0.102354	0.793766
Nop60B	FBgn0259937	1624.3	2.11	1.078	0.000429846	0.0144481	2487.22	3.054	1.611	8.82917e-07	0.000617766	286.4	0.957	-0.064	0.804944	0.978269
nos	FBgn0002962	46.65	25.563	4.676	0.0021586	0.0424963	4.48	0.024	-5.385	0.119282	0.820253	1.23	9.412	3.235	0.21171	0.856764
NPF	FBgn0027109	281.18	1.854	0.891	0.000606662	0.0182387	534.82	0.59	-0.76	0.0240476	0.540588	263.5	1.105	0.143	0.781959	0.971434
nrv2	FBgn0015777	20117.3	0.732	-0.451	0.00024348	0.00953699	11275.5	0.89	-0.169	0.417383	0.999991	2375.54	0.992	-0.011	0.925262	0.98131
nst	FBgn0036298	577.78	0.562	-0.832	0.000875117	0.0231839	444.59	1.074	0.103	0.809584	0.999991	175.56	1.128	0.174	0.396969	0.908332
Nup43	FBgn0038609	63.63	4.124	2.044	0.000529481	0.0166031	57.35	1.059	0.082	0.87308	0.999991	17.71	0.905	-0.144	0.792287	0.973874
Obp19c	FBgn0031111	110.4	0.429	-1.22	0.00160384	0.0363108	130.81	0.956	-0.064	0.88443	0.999991	24.74	0.991	-0.014	0.979951	0.994663
Obp44a	FBgn0033268	9752.7	0.453	-1.143	0.00153633	0.035205	4459.81	0.603	-0.73	0.00216209	0.14238	1689.41	1.873	0.905	0.043322	0.694714
Obp83g	FBgn0046875	247.96	0.4	-1.321	3.38317e-07	5.98397e-05	85.51	0.934	-0.099	0.838718	0.999991	23	0.658	-0.604	0.182646	0.844342
olf186-M	FBgn0015522	847.53	1.953	0.966	1.43831e-08	4.78871e-06	1039.2	0.628	-0.672	0.10026	0.812466	417.93	0.865	-0.209	0.365438	0.900691
orb	FBgn0004882	778.18	1.941	0.957	0.000142207	0.00651733	562.48	1.27	0.345	0.381846	0.997586	163.5	0.995	-0.008	0.975779	0.992401
Oscillin	FBgn0031717	212.32	0.426	-1.232	0.000291534	0.0109277	226.01	1.493	0.578	0.116085	0.820253	107.09	0.786	-0.348	0.286778	0.876178
Ost48	FBgn0014868	960.44	0.466	-1.102	1.91181e-10	1.03056e-07	833.23	0.706	-0.503	0.0775471	0.787891	452.7	0.997	-0.004	0.986661	0.99631
otu	FBgn0003023	185.56	19.76	4.305	2.70234e-06	0.000336159	26.63	0.257	-1.961	0.0952742	0.811416	11.57	4.669	2.223	0.0687807	0.744498
oxt	FBgn0015360	681.21	0.667	-0.584	0.00144488	0.0337934	593.72	0.913	-0.132	0.674197	0.999991	202.11	0.885	-0.176	0.525089	0.921322
p24-1	FBgn0030341	732.59	0.644	-0.634	8.82175e-05	0.00451865	651.69	0.97	-0.043	0.904244	0.999991	308.89	0.957	-0.063	0.826701	0.979762
P5cr	FBgn0015781	427.25	0.635	-0.655	0.000876563	0.0231839	509.64	0.987	-0.019	0.95115	0.999991	202.01	1.235	0.304	0.269343	0.869069
Paip2	FBgn0038100	2027.63	1.552	0.634	0.00223849	0.0437795	2312.15	1.277	0.353	0.514448	0.999991	597.87	1.386	0.471	0.110893	0.798725
Pak	FBgn0267698	5493.62	1.285	0.362	0.00129192	0.0310015	6029.46	0.896	-0.158	0.58743	0.999991	1274.27	1.186	0.246	0.259828	0.865531
Pc	FBgn0003042	709.18	1.51	0.595	0.00156138	0.0355631	697.58	0.786	-0.348	0.305149	0.972783	184.98	1.052	0.073	0.732024	0.966585
Pdh	FBgn0011693	16621.5	0.534	-0.905	0.00202533	0.0413102	12848.3	0.902	-0.149	0.494362	0.999991	3755.29	1.027	0.038	0.885269	0.979762
peb	FBgn0003053	1110.93	1.683	0.751	1.57223e-05	0.00125335	1248.72	1.565	0.647	0.171756	0.900497	177.12	1.348	0.431	0.110001	0.798725
Pebp1	FBgn0038973	51.53	0.069	-3.858	0.00188896	0.0401182	0.47	0.831	-0.267	0.953006		6.81	0.987	-0.019	0.982766	0.995329
Pen	FBgn0267727	344.18	6.464	2.692	2.32251e-06	0.000309303	53.43	0.135	-2.887	0.00602392	0.262404	38.83	20.931	4.388	0.000180623	0.113765
peng	FBgn0015527	1287.76	1.776	0.829	7.04218e-05	0.00386978	1965.76	1.661	0.732	0.00188597	0.126428	355.29	1.245	0.316	0.357485	0.899208
Peritrophin-A	FBgn0022770	523.65	0.461	-1.118	0.000122915	0.00589574	79.49	0.822	-0.282	0.52633	0.999991	42.61	2.37	1.245	0.000358418	0.1505
Pfas	FBgn0000052	3012.01	0.617	-0.696	0.000328571	0.0119212	4554.64	2.565	1.359	0.0160916	0.434557	2029.6	0.995	-0.008	0.986438	0.996292
Pgd	FBgn0004654	1293.12	0.449	-1.156	6.71037e-07	0.000110089	1312.86	0.931	-0.104	0.824927	0.999991	687.41	0.846	-0.241	0.472465	0.915226
PGRP-SD	FBgn0035806	107.16	0.317	-1.657	0.0014291	0.0335431	245.34	1.17	0.227	0.601083	0.999991	181.66	1.025	0.036	0.948016	0.986774
Phs	FBgn0036522	244.65	3.101	1.633	0.000989133	0.02539	146.77	0.983	-0.024	0.969202	0.999991	60.61	2.146	1.102	0.089073	0.773704
phu	FBgn0043791	240.48	0.248	-2.011	0.00179473	0.0390699	42.57	1.548	0.631	0.553968	0.999991	40.78	1.026	0.037	0.953886	0.986774
PIG-G	FBgn0033187	364.51	0.601	-0.735	0.00209779	0.0419558	447.87	1.127	0.172	0.680005	0.999991	202.89	0.769	-0.379	0.344827	0.897362
pio	FBgn0020521	8576.8	0.716	-0.483	0.000898134	0.023589	5373.89	0.879	-0.186	0.479254	0.999991	1583.01	0.864	-0.21	0.164848	0.835769
pip	FBgn0003089	152	0.266	-1.912	1.86311e-06	0.000254101	13.67	1.513	0.598	0.625192	0.999991	11.71	1.281	0.357	0.609459	0.93071
Pka-C3	FBgn0000489	3954.28	1.384	0.469	0.00104097	0.0264211	3836.27	1.22	0.286	0.391669	0.999592	675.01	0.991	-0.014	0.917422	0.979762
Pkcdelta	FBgn0259680	3001.94	1.863	0.898	1.11669e-05	0.000957644	3055.03	0.849	-0.236	0.611504	0.999991	470.16	1.421	0.507	0.151114	0.820022
pn	FBgn0003116	295.52	0.611	-0.711	0.00207174	0.0419392	347.7	1.154	0.207	0.602666	0.999991	172.21	0.665	-0.589	0.123968	0.799973
pnut	FBgn0013726	2864.19	1.298	0.377	0.00163361	0.0365462	2857.36	1.13	0.176	0.458544	0.999991	624.86	1.312	0.392	0.261167	0.865531
pot	FBgn0250871	2863.15	0.595	-0.749	2.35247e-05	0.00167484	949.09	0.812	-0.3	0.356403	0.987822	333.75	1.034	0.049	0.81455	0.979762
Ppn	FBgn0003137	12894.4	0.772	-0.374	0.000833457	0.0223043	12970.2	1.237	0.307	0.277078	0.962884	5376.07	1.208	0.272	0.46619	0.915226
PPO1	FBgn0283437	1623.53	2.258	1.175	3.84373e-06	0.000445339	6359.02	1.411	0.496	0.16541	0.89323	1100.96	2.068	1.048	3.02675e-06	0.009532
PPO2	FBgn0033367	2625.98	2.032	1.023	0.000215374	0.00864549	9156.91	1.005	0.007	0.980614	0.999991	1605.72	2.07	1.049	0.000136285	0.113765
prc	FBgn0028573	323.69	0.531	-0.912	0.000497433	0.0159649	63.71	0.929	-0.107	0.859294	0.999991	14.01	2.34	1.227	0.165275	0.835769
primo-1	FBgn0040077	689.19	0.556	-0.846	0.00211627	0.0421038	828.15	0.819	-0.287	0.401119	0.999991	302.25	0.681	-0.555	0.0560922	0.722488
primo-2	FBgn0040076	7.99	83.745	6.388	0.00106059	0.0266956	0.54	0.207	-2.272	0.614199		3.93	0.168	-2.576	0.0780865	0.757241
Proc	FBgn0045038	935.51	1.916	0.938	9.93239e-05	0.00497499	948.89	0.809	-0.306	0.393946	0.999991	238.58	1.123	0.167	0.605324	0.929769
Prosbeta1	FBgn0010590	648.82	0.569	-0.814	0.00164006	0.0365462	524.1	0.84	-0.251	0.49658	0.999991	319.71	0.871	-0.198	0.487257	0.916941
Prosbeta2	FBgn0023174	1489.85	0.74	-0.434	0.00155888	0.0355631	1273.74	0.808	-0.308	0.27714	0.962884	531.22	1.023	0.033	0.855006	0.979762
Prosbeta4	FBgn0032596	645.17	0.594	-0.752	0.000938468	0.0244217	376.57	0.866	-0.207	0.587422	0.999991	301.56	0.886	-0.174	0.606208	0.929769
Prp3	FBgn0036915	680.86	1.453	0.539	0.00119678	0.0293237	719.94	0.829	-0.271	0.303078	0.972244	223.62	0.98	-0.029	0.916078	0.979762
prtp	FBgn0030329	1223.06	0.689	-0.538	0.000706122	0.0199832	1262.33	0.926	-0.112	0.725869	0.999991	525.46	0.901	-0.151	0.486876	0.916941
Ptp99A	FBgn0004369	11399.4	1.47	0.556	0.00186728	0.0400321	11207.1	0.855	-0.227	0.529423	0.999991	2289.27	1.277	0.353	0.22923	0.860804
Pxd	FBgn0004577	295.18	0.299	-1.741	0.000975501	0.025097	12.33	0.156	-2.683	0.0570334	0.723989	1.71	0.068	-3.876	0.149084	0.820022
Pxt	FBgn0261987	121.34	12.635	3.659	4.46072e-05	0.00275931	17.44	0.05	-4.313	0.0362987	0.623904	8.51	139.284	7.122	0.0533047	0.720272
Pym	FBgn0034918	224.99	2.456	1.296	9.70861e-06	0.000872234	171.9	0.919	-0.121	0.774641	0.999991	36.59	0.739	-0.436	0.366897	0.900691
pyr	FBgn0033649	1609.81	1.858	0.894	6.4901e-06	0.000627931	1626.39	1.051	0.071	0.849004	0.999991	245.02	1.187	0.248	0.56689	0.921322
qsm	FBgn0028622	761.98	0.639	-0.646	0.000897804	0.023589	402.88	0.968	-0.047	0.897561	0.999991	133.28	1.1	0.138	0.619427	0.932421
Rab35	FBgn0031090	2717.16	1.595	0.673	0.000517916	0.0163318	2643.4	1.218	0.284	0.492395	0.999991	670.02	1.349	0.432	0.250625	0.865531
Ravus	FBgn0038128	331.39	1.793	0.843	0.00100379	0.025708	362.18	0.887	-0.173	0.669069	0.999991	71.11	1.088	0.121	0.774087	0.97051
rdhB	FBgn0038946	1023.11	0.539	-0.891	9.76063e-07	0.00014732	883.51	1.053	0.074	0.834854	0.999991	260.73	0.687	-0.542	0.0610114	0.733165
reb	FBgn0033667	319.01	0.384	-1.381	6.1871e-05	0.00359169	63.89	0.689	-0.538	0.304116	0.972244	4.77	1.596	0.674	0.470124	0.915226
REPTOR-BP	FBgn0032202	2773.04	2.099	1.07	3.24385e-14	3.06004e-11	3466.51	1.056	0.079	0.877438	0.999991	615.65	1.05	0.07	0.778498	0.971152
retm	FBgn0031814	2040.41	0.742	-0.43	0.00223925	0.0437795	2581.51	1.167	0.223	0.45119	0.999991	992.5	0.93	-0.104	0.721476	0.963276
retn	FBgn0004795	3183.93	1.469	0.555	0.000497845	0.0159649	2670	0.9	-0.152	0.502784	0.999991	646.74	1.331	0.412	0.121473	0.798725
Rif1	FBgn0050085	281.5	1.606	0.684	0.00204961	0.04158	117.13	0.64	-0.645	0.184825	0.911517	49.98	1.239	0.31	0.355171	0.898597
Rim2	FBgn0031359	2585.28	1.365	0.449	0.00276208	0.0499469	2631.42	0.8	-0.323	0.454319	0.999991	585.27	0.976	-0.035	0.81771	0.979762
Rlip	FBgn0026056	2587.74	1.549	0.631	0.000638303	0.018704	2550.91	1.163	0.217	0.511831	0.999991	349.5	1.001	0.001	0.995605	0.998511
Rm62	FBgn0003261	24783.5	1.581	0.661	0.000197362	0.00812412	30036.4	1.19	0.251	0.392521	0.999991	6733.23	1.097	0.134	0.571948	0.921322
rngo	FBgn0030753	1552.51	1.707	0.772	6.26623e-06	0.000622226	1750.84	0.989	-0.016	0.959561	0.999991	676.09	1.369	0.453	0.0935813	0.783577
Rop	FBgn0004574	7160.09	0.748	-0.419	0.000300927	0.0111426	5992.3	0.85	-0.234	0.281421	0.966746	1432.25	0.822	-0.282	0.254272	0.865531
RpLP0-like	FBgn0033485	790.51	1.531	0.614	0.000740944	0.0204861	1359.26	2.287	1.193	2.66525e-06	0.00124323	150.17	1.144	0.194	0.677398	0.948423
RpS25	FBgn0086472	23486.7	1.335	0.416	0.000424026	0.0143283	32437.2	0.993	-0.01	0.962015	0.999991	8526.08	0.974	-0.039	0.83859	0.979762
Rrp47	FBgn0030711	503.16	2.5	1.322	2.17345e-05	0.00157715	408.12	1.471	0.557	0.0599099	0.739546	108.52	1.576	0.656	0.0660503	0.741951
rudhira	FBgn0266019	21630	1.634	0.709	0.00180265	0.039167	18009.9	1.486	0.571	0.187505	0.911517	2459.81	1.607	0.684	0.048322	0.710381
ry	FBgn0003308	946.99	0.482	-1.053	0.000578043	0.0176809	1152.99	1.797	0.845	0.0344492	0.612156	664.4	0.971	-0.042	0.871346	0.979762
scb	FBgn0286785	637.22	0.686	-0.544	0.00185145	0.039845	444.33	0.995	-0.007	0.98607	0.999991	209.78	0.879	-0.187	0.425402	0.909548
SCCRO4	FBgn0036967	1966	1.661	0.732	0.00193388	0.0404649	1845.54	1.198	0.26	0.432025	0.999991	374.41	1.453	0.539	0.190376	0.84972
se	FBgn0086348	1094.84	0.525	-0.93	3.11619e-05	0.00210117	266.2	0.774	-0.369	0.427281	0.999991	170.64	1.028	0.04	0.915806	0.979762
Sec13	FBgn0024509	1331.48	0.689	-0.538	0.000313916	0.0115502	1186.88	0.754	-0.407	0.260431	0.95537	528.53	1.178	0.236	0.398289	0.908332
Sec23	FBgn0262125	2439.16	0.62	-0.689	6.21112e-06	0.000622226	2063.04	0.723	-0.468	0.18324	0.910909	1043.02	0.959	-0.061	0.703274	0.954649
Sec61alpha	FBgn0086357	2455.78	0.419	-1.255	1.01472e-06	0.00015114	2401.35	1.192	0.254	0.548271	0.999991	1333.02	0.896	-0.158	0.601995	0.928718
seq	FBgn0028991	1375.12	1.509	0.594	5.36692e-05	0.00323322	1129.21	1.175	0.232	0.418956	0.999991	197.46	0.959	-0.06	0.877201	0.979762
Ser7	FBgn0019929	1216.94	0.558	-0.841	0.000165412	0.0072018	1469.74	0.888	-0.171	0.502756	0.999991	1033.23	0.706	-0.502	0.192633	0.851739
serp	FBgn0260653	7551.29	0.49	-1.029	6.96824e-05	0.00384783	648.16	0.471	-1.086	0.000116723	0.021076	182.09	1.652	0.725	0.138819	0.812593
SerRS	FBgn0031497	1800.81	0.674	-0.57	0.000964914	0.0248812	2016.27	0.964	-0.053	0.873702	0.999991	605.12	0.946	-0.08	0.631149	0.937735
Sgs1	FBgn0003372	897.72	2.247	1.168	2.74556e-05	0.00190673	997.33	0.545	-0.876	0.0883709	0.798156	304.59	4.173	2.061	0.0541683	0.720272
sip3	FBgn0039875	923.59	0.652	-0.618	0.000205432	0.00833508	1048.58	0.922	-0.116	0.624388	0.999991	381.63	1.009	0.013	0.9531	0.986774
Skeletor	FBgn0262717	1259.48	0.516	-0.956	6.07664e-05	0.00354575	602.16	0.726	-0.461	0.0927499	0.804608	272.44	1.032	0.046	0.84807	0.979762
SLC22A	FBgn0037140	225.58	0.476	-1.071	0.000543211	0.0169398	134.51	0.884	-0.179	0.651074	0.999991	34.6	0.849	-0.236	0.586533	0.921322
Slh	FBgn0264978	672.68	0.629	-0.669	0.000214083	0.00862429	642.18	0.836	-0.258	0.565905	0.999991	296.4	0.928	-0.107	0.726576	0.965215
Slob	FBgn0264087	31511.7	1.536	0.619	0.00117076	0.0287484	33934.9	0.74	-0.434	0.0725967	0.787891	6369.1	1.152	0.205	0.458816	0.915226
SMC2	FBgn0027783	354.67	2.117	1.082	1.46734e-06	0.000210257	233.01	0.967	-0.048	0.909441	0.999991	60.61	1.676	0.745	0.15994	0.828142
smg	FBgn0016070	3452	2.078	1.055	0.000298537	0.0111166	2926.21	0.695	-0.525	0.141056	0.855125	800.86	1.064	0.09	0.657099	0.943703
SmydA-7	FBgn0034182	648.17	0.675	-0.567	0.000886582	0.0233942	311.82	0.86	-0.217	0.498025	0.999991	113.52	0.634	-0.657	0.00751747	0.479889
Socs16D	FBgn0030869	3381.85	1.479	0.564	9.11809e-05	0.00460789	3736.53	1.05	0.07	0.834477	0.999991	826.98	1.241	0.311	0.12174	0.798725
sofe	FBgn0030242	47	3.189	1.673	0.0024355	0.0462582	29.29	0.602	-0.732	0.336646	0.984536	8.54	0.565	-0.823	0.486739	0.916921
SoYb	FBgn0051755	56.54	3.41	1.77	0.000460634	0.0152467	59.6	0.857	-0.223	0.821136	0.999991	27.8	1.134	0.182	0.701186	0.954185
SP1029	FBgn0263236	2300.9	0.74	-0.434	0.00170194	0.0375577	2319.68	0.786	-0.347	0.232242	0.9448	895.32	0.854	-0.228	0.157138	0.825466
SP1173	FBgn0035710	1300.4	0.639	-0.645	0.000373424	0.0131278	1125.67	1.45	0.536	0.0434443	0.656621	424.78	0.954	-0.068	0.774093	0.97051
SPE	FBgn0039102	3852.35	0.407	-1.297	2.507e-05	0.0017737	3477.29	1.303	0.382	0.285243	0.966746	2892.66	0.641	-0.641	0.424364	0.90945
Spn43Ad	FBgn0044011	61.53	0.27	-1.888	0.000410471	0.0141663	102.12	0.843	-0.246	0.621801	0.999991	118.21	0.471	-1.087	0.0344074	0.676989
Spp	FBgn0031260	1334.94	0.48	-1.06	0.000319841	0.0116418	1405.27	1.335	0.417	0.326759	0.979174	664.07	1.04	0.056	0.838726	0.979762
Spps	FBgn0039169	973.99	1.8	0.848	2.83796e-07	5.09931e-05	1096.74	1.476	0.561	0.13267	0.840063	225.12	1.225	0.292	0.381057	0.906843
Sptr	FBgn0014032	182.49	0.536	-0.901	0.00084822	0.0226459	210.57	0.946	-0.081	0.807856	0.999991	78.96	0.726	-0.463	0.242042	0.863183
sr	FBgn0003499	1192.56	1.754	0.811	7.49893e-05	0.00398535	1080.86	1.208	0.272	0.285768	0.966746	230.05	0.929	-0.107	0.549511	0.921322
Srp68	FBgn0035947	788.63	0.484	-1.047	1.47608e-05	0.00118672	769.18	0.973	-0.039	0.879774	0.999991	364.27	0.914	-0.129	0.452873	0.915226
Srp72	FBgn0038810	1594	0.642	-0.639	0.000637761	0.018704	1580.53	0.929	-0.107	0.713322	0.999991	603.42	0.965	-0.052	0.751719	0.970432
Srpk79D	FBgn0025702	5033.02	1.475	0.561	0.000573248	0.0176336	5440.94	0.782	-0.354	0.251108	0.951021	1151.23	1.214	0.28	0.373842	0.904432
sstn	FBgn0036476	500.1	1.528	0.612	0.00212771	0.0422433	436.44	0.812	-0.3	0.36922	0.991555	127.69	1.086	0.119	0.681272	0.948423
sti	FBgn0002466	79.67	12.627	3.658	4.98923e-05	0.00303646	37.15	1.222	0.289	0.774701	0.999991	19.81	11.056	3.467	0.00117887	0.228464
stw	FBgn0286203	1587.54	0.454	-1.138	0.00015684	0.00696248	504.62	0.838	-0.256	0.412502	0.999991	207.17	1.128	0.173	0.412641	0.908332
su(w[a])	FBgn0003638	8383.74	1.417	0.503	1.77777e-05	0.00135976	13144.5	1.06	0.085	0.7295	0.999991	2903.37	1.154	0.206	0.371007	0.902847
Tep4	FBgn0041180	6202.22	0.59	-0.761	2.48419e-06	0.000319557	7568.25	0.83	-0.269	0.287896	0.967705	4081.48	0.919	-0.122	0.350443	0.897991
tfc	FBgn0035199	286.36	0.61	-0.714	0.0013544	0.0320748	128.67	0.701	-0.513	0.213236	0.935457	17.51	0.791	-0.338	0.453191	0.915226
Tgi	FBgn0036373	2390.31	1.493	0.578	0.00204821	0.04158	2289.28	1.035	0.049	0.882978	0.999991	747.35	1.366	0.45	0.318938	0.886827
Tmem63	FBgn0033259	706.38	0.709	-0.496	0.00272432	0.0496607	779.36	1.136	0.184	0.573316	0.999991	356.23	0.887	-0.172	0.633629	0.938019
Toll-7	FBgn0034476	626.78	0.705	-0.505	0.00187754	0.0401015	459.68	0.921	-0.118	0.684631	0.999991	193.2	0.933	-0.099	0.679837	0.948423
TpnC47D	FBgn0010423	140.5	0.337	-1.571	0.000579472	0.0176809	12.05	0.786	-0.347	0.755999	0.999991	5.82	0.616	-0.699	0.619509	0.932421
TRAM	FBgn0040340	1735.56	0.491	-1.026	4.69412e-05	0.0028723	1739.68	1.357	0.441	0.251676	0.951219	840.24	1.123	0.168	0.632596	0.938019
Trf2	FBgn0261793	4359.78	1.488	0.573	0.00267355	0.0491309	4363.08	1.333	0.414	0.209304	0.931488	870.21	1.246	0.317	0.175024	0.838043
Trx-2	FBgn0040070	1613.17	0.643	-0.637	1.94604e-05	0.00144929	1393.1	0.9	-0.152	0.666456	0.999991	529.73	0.937	-0.094	0.568453	0.921322
Tsf1	FBgn0022355	35801	0.273	-1.874	4.637e-06	0.000515361	29424.2	1.186	0.246	0.531747	0.999991	67809.9	0.571	-0.809	0.308926	0.884621
Tsf3	FBgn0034094	227.68	0.603	-0.73	0.00153105	0.0351552	370.28	1.953	0.965	0.0726838	0.787891	102.82	0.777	-0.364	0.46017	0.915226
tw	FBgn0086368	242.99	0.495	-1.016	0.00228103	0.0439138	146.17	1.208	0.272	0.517232	0.999991	50.41	1.335	0.417	0.301287	0.881957
twe	FBgn0002673	81.13	2.616	1.387	0.000740811	0.0204861	43.79	0.903	-0.148	0.82542	0.999991	20.78	0.981	-0.028	0.960881	0.987374
twi	FBgn0003900	34.67	6.463	2.692	0.000154101	0.00692052	9.37	2.049	1.035	0.535655	0.999991	5.47	2.284	1.192	0.26733	0.868985
Ubc4	FBgn0015321	3451.82	1.499	0.584	7.24798e-05	0.00390701	3391.92	1.271	0.346	0.282658	0.966746	564.1	1.358	0.441	0.211922	0.856764
UGP	FBgn0035978	7287.59	0.495	-1.013	0.00191097	0.0402834	6332.35	1.078	0.108	0.657778	0.999991	3340.73	0.712	-0.491	0.120392	0.798725
Ugt36E1	FBgn0027070	463.87	0.422	-1.245	6.02869e-06	0.000615088	758.53	1.066	0.093	0.755718	0.999991	581.52	0.746	-0.424	0.13454	0.810879
uif	FBgn0031879	1840.58	0.525	-0.929	2.78066e-05	0.00191933	801.85	0.914	-0.129	0.756885	0.999991	307.4	0.842	-0.248	0.344212	0.897362
Unc-115b	FBgn0260463	29.18	0.029	-5.11	0.000657524	0.0190362	35.07	14.421	3.85	0.357386	0.987822	15.88	19.054	4.252	0.000281878	0.149064
upSET	FBgn0036398	7259.96	1.473	0.559	0.00143121	0.0335431	6951.05	0.982	-0.027	0.942043	0.999991	1656.95	1.249	0.321	0.21702	0.856764
uri	FBgn0035025	320.35	1.534	0.618	0.00267131	0.0491309	294.72	0.853	-0.229	0.569885	0.999991	65.84	0.972	-0.041	0.90742	0.979762
usp	FBgn0003964	2186.85	1.607	0.685	0.00146391	0.0340976	2026.03	0.877	-0.189	0.556869	0.999991	491.19	1.271	0.346	0.289758	0.878273
Vajk2	FBgn0032538	15075.7	0.288	-1.796	6.53142e-05	0.00371536	474.68	0.47	-1.09	0.000262109	0.038108	74.83	4.743	2.246	0.00438657	0.40374
Vajk3	FBgn0028544	7602.57	0.26	-1.942	6.25548e-06	0.000622226	32.07	0.823	-0.281	0.697111	0.999991	46.68	9.87	3.303	0.0024504	0.321317
vas	FBgn0283442	99.38	8.093	3.017	0.00050186	0.0160482	11.19	0.616	-0.699	0.644838	0.999991	9.53	1.633	0.708	0.477945	0.915226
verm	FBgn0261341	3660.22	0.423	-1.243	2.68842e-20	1.01443e-16	395.49	0.528	-0.921	0.0119041	0.369344	121.89	0.717	-0.48	0.0616824	0.735808
Vm26Ab	FBgn0003980	269.94	0.047	-4.397	3.04955e-06	0.000371193	43.99	0.033	-4.901	0.000611756	0.0714442	11.15	9.303	3.218	0.0295664	0.673505
Vm34Ca	FBgn0003983	69.34	0.004	-8.046	6.68867e-08	1.61097e-05	28.57	0	-21.566			2.47	1.631	0.706	0.603201	0.92936
wapl	FBgn0004655	2407.24	1.434	0.52	0.000817972	0.0220926	2082.07	0.96	-0.058	0.82	0.999991	637.74	1.251	0.323	0.133363	0.810801
wdn	FBgn0005642	437.44	1.809	0.855	0.00023147	0.00919383	478.37	0.749	-0.417	0.111831	0.820253	242.77	0.864	-0.211	0.302231	0.882483
wdp	FBgn0034718	4919.28	0.669	-0.58	4.45482e-05	0.00275931	5999.37	1.103	0.141	0.669431	0.999991	2158.25	1.154	0.207	0.429819	0.910468
wge	FBgn0051151	3176.75	1.373	0.457	0.00264837	0.0489063	3150.28	0.952	-0.071	0.85645	0.999991	869.05	1.313	0.393	0.0648745	0.738234
wisp	FBgn0260780	362.56	7.899	2.982	0.000134353	0.00631029	82.95	0.501	-0.999	0.139689	0.851126	35.63	1.836	0.877	0.0346938	0.676989
Wnk	FBgn0037098	5158.52	1.383	0.468	0.00193261	0.0404649	4810.13	0.858	-0.221	0.344643	0.987413	1253.86	1.186	0.246	0.345541	0.897362
wol	FBgn0261020	212.26	0.488	-1.034	0.0012937	0.0310015	212.3	1.441	0.527	0.298456	0.971524	132.45	0.832	-0.265	0.352486	0.898597
Wsck	FBgn0046685	409.98	0.405	-1.305	1.44439e-05	0.00118423	385.56	0.803	-0.317	0.388723	0.997873	144.08	0.677	-0.562	0.0316759	0.676989
wus	FBgn0030805	33.33	3.778	1.918	0.00150893	0.0347369	12.83	1.627	0.703	0.539028	0.999991	6.22	1.508	0.593	0.586132	0.921322
xit	FBgn0029906	130.12	0.363	-1.464	0.000342674	0.0122755	186.81	0.891	-0.166	0.759684	0.999991	111.01	0.619	-0.692	0.145422	0.819541
Xport-B	FBgn0260234	180.11	3.44	1.783	3.78704e-08	1.07173e-05	170.62	1.652	0.724	0.767438	0.999991	26.23	0.361	-1.47	0.0349035	0.676989
yellow-b	FBgn0032601	279.64	0.507	-0.981	7.11701e-05	0.0038733	184.01	0.889	-0.17	0.640736	0.999991	93.13	0.85	-0.234	0.505962	0.921322
yip2	FBgn0040064	2027.71	0.643	-0.638	0.00187076	0.0400321	1765.78	1.548	0.63	0.0547623	0.714909	921.04	0.915	-0.128	0.515541	0.921322
Ykt6	FBgn0260858	1962.95	1.541	0.624	0.00015345	0.00692052	1909.58	1.078	0.108	0.725115	0.999991	449.15	1.427	0.513	0.128824	0.800319
zfh1	FBgn0004606	1374.85	1.418	0.504	0.00188885	0.0401182	1315.29	1.272	0.347	0.420638	0.999991	399.6	1.813	0.859	0.0596743	0.733165
zld	FBgn0259789	959.94	2.348	1.231	0.00154177	0.0352583	667.86	0.851	-0.233	0.475177	0.999991	227.05	2.563	1.358	0.010746	0.531786
Table S1. The table list the differentially expressed genes between virgin and mated females at days 1, 4 and 20. The rows highlighted in orange indicate the genes that are also differentially expressed at another time point.
