# Supplementary material for: Temporal and sequential order of nonoverlapping gene networks unraveled in mated female Drosophila
Source: Life Sci Alliance. 2021 Nov 29;5(2):e202101119. doi: 10.26508/lsa.202101119 (PMC8645335; doi:10.26508/lsa.202101119)
Supplement: Supplementary file 7 [file LSA-2021-01119_TableS7.xlsx]

## Sheet: modules 4 days
gene stable ID	Gene name	FoldChange	log2FoldChange	P-value	padj	# module	Is diffExp?
FBgn0031851	Aatf	1.7	0.765	0.0110231652961825	0.359779403763157	1
FBgn0033169	CG11123	2.256	1.174	3.38719838957764E-6	0.00147983355758024	1	true
FBgn0035524	CG11583	1.548	0.63	0.0540049082007872	0.711276408597426	1
FBgn0039274	CG11920	2.501	1.323	0.00140418264254529	0.114038398461816	1
FBgn0036514	CG12301	1.863	0.897	0.0244091233707908	0.540776151281024	1
FBgn0030630	CG12608	1.563	0.644	0.00737964740640239	0.292550760606236	1
FBgn0036656	CG13026	0.513	-0.962	0.00275947273529227	0.168810367604355	1
FBgn0032050	CG13096	3.078	1.622	1.40994298505635E-6	7.48654025175136E-4	1	true
FBgn0032051	CG13097	1.733	0.793	0.0105122535845477	0.354436326693959	1
FBgn0039828	CG1542	1.517	0.601	0.0560348282057801	0.71936985131077	1
FBgn0039809	CG15547	0.704	-0.506	0.183598490203322	0.911478979080351	1
FBgn0039972	CG17018	0.238	-2.068	0.0709475530163853	0.784764311158227	1
FBgn0030321	CG1703	1.589	0.668	0.00512776374582226	0.247436703165863	1
FBgn0039959	CG17514	1.61	0.687	0.0367203301814332	0.624293961775428	1
FBgn0038601	CG18600	1.414	0.5	0.150530997344928	0.876830686827758	1
FBgn0029672	CG2875	2.747	1.458	0.00248204135045792	0.155231580549589	1
FBgn0050349	CG30349	1.405	0.49	0.0677807046809103	0.767244680387048	1
FBgn0051522	CG31522	0.841	-0.25	0.536489248940172	0.999990991829888	1
FBgn0051674	CG31674	1.161	0.215	0.729357728698975	0.999990991829888	1
FBgn0052344	CG32344	1.55	0.633	0.0423017431351513	0.64717126285882	1
FBgn0052409	CG32409	1.814	0.859	0.0432738591481506	0.656437470411309	1
FBgn0261373	CG33228	0.944	-0.083	0.891831924727417	0.999990991829888	1
FBgn0036018	CG3335	1.609	0.686	0.0388325559934581	0.633232913621791	1
FBgn0053506	CG33506	1.516	0.6	0.185023128516808	0.911516976311639	1
FBgn0011824	CG4038	1.806	0.853	3.03348705645129E-4	0.0424498594962152	1	true
FBgn0259742	CG42360	1.587	0.666	0.0823682392186953	0.792133738884641	1
FBgn0260456	CG4806	1.323	0.404	0.242828308828462	0.949826167983931	1
FBgn0028744	CG5033	1.977	0.984	0.0021099030857567	0.140597410982418	1
FBgn0039182	CG5728	2.118	1.083	4.37421578756397E-4	0.0581511642295483	1
FBgn0039233	CG7006	2.69	1.428	0.0409482815997542	0.642225336479826	1
FBgn0030081	CG7246	2.874	1.523	0.00283668921410338	0.169822116320253	1
FBgn0037073	CG7338	1.716	0.779	0.0044198239382587	0.218937738888523	1
FBgn0036188	CG7339	1.941	0.957	0.00236996556476162	0.15074866191765	1
FBgn0033548	CG7637	2.331	1.221	8.08558898044554E-5	0.0167626238214977	1	true
FBgn0036686	CG7728	2.033	1.024	9.37750530649065E-5	0.0184177494572215	1	true
FBgn0284246	CG7845	2.006	1.004	0.00670048520020896	0.274768981012232	1
FBgn0039735	CG7911	1.418	0.504	0.0458988626983376	0.674492974247047	1
FBgn0038235	CG8461	0.921	-0.119	0.822905214764714	0.999990991829888	1
FBgn0033741	CG8545	2.399	1.263	2.42779061348674E-7	2.09070122446031E-4	1	true
FBgn0031663	CG8891	2.037	1.026	0.00906070526244862	0.324063886639403	1
FBgn0030720	CG8939	1.754	0.811	7.77509613716715E-4	0.0836944242842175	1
FBgn0032925	CG9246	2.018	1.013	0.00221427984483567	0.143288224641245	1
FBgn0032919	CG9253	1.76	0.816	0.00408562618685231	0.207902659826417	1
FBgn0038146	CG9799	1.548	0.63	0.179671467042966	0.905451225839462	1
FBgn0010220	Dbp45A	1.473	0.559	0.0771437110530192	0.787891214299683	1
FBgn0035063	Eap	2.366	1.243	0.00744769689797029	0.292550760606236	1
FBgn0013269	FK506-bp1	2.274	1.185	1.45849799675789E-4	0.0229970212305698	1	true
FBgn0038295	Gyc88E	0.805	-0.313	0.218192765419897	0.939019369680587	1
FBgn0042712	HBS1	0.733	-0.449	0.107036487469802	0.819683473114833	1
FBgn0001330	kz	1.929	0.948	0.0279030239264602	0.56989817936501	1
FBgn0010651	l(2)08717	1.446	0.532	0.0755458017007206	0.787891214299683	1
FBgn0086447	l(2)37Cg	2.9	1.536	0.00841790875002563	0.317706542078564	1
FBgn0021979	l(2)k09913	0.736	-0.442	0.1111554738821	0.820253456048773	1
FBgn0034611	MFS16	0.993	-0.01	0.970241294489352	0.999990991829888	1
FBgn0058263	MFS17	1.987	0.991	0.00407430095070429	0.207902659826417	1
FBgn0002780	mod	2.217	1.148	4.71839542566295E-4	0.0607154445865479	1
FBgn0033379	Mys45A	2.204	1.14	5.12974998875561E-4	0.0652585808228626	1
FBgn0263510	nclb	2.3	1.202	0.00312003517201536	0.176463515308285	1
FBgn0016685	Nlp	1.523	0.607	0.03005263194181	0.582335870037373	1
FBgn0038585	Non3	1.241	0.312	0.424437498759914	0.999990991829888	1
FBgn0038964	Nop56	2.62	1.389	1.77237398875062E-4	0.0275579538945322	1	true
FBgn0259937	Nop60B	3.054	1.611	8.82917473089348E-7	6.17766319452203E-4	1	true
FBgn0011207	pelo	1.697	0.763	0.0122164238857068	0.37303331416635	1
FBgn0030067	Rbm13	2.827	1.499	5.17026064498428E-9	1.44702669801498E-5	1	true
FBgn0039306	RIOK2	1.841	0.88	0.00584182509998303	0.262403917064382	1
FBgn0019938	RpI1	1.9	0.926	7.53503521910689E-4	0.0827007051744133	1
FBgn0017579	RpL14	0.651	-0.618	0.0125616700021753	0.376639674230206	1
FBgn0086710	RpL30	0.508	-0.976	1.16406674780878E-5	0.00361992423381091	1	true
FBgn0002626	RpL32	0.493	-1.02	1.600506078996E-6	7.79028937146097E-4	1	true
FBgn0037686	RpL34b	0.67	-0.577	0.0105499246456381	0.354436326693959	1
FBgn0039857	RpL6	0.619	-0.692	0.00350944712233213	0.188885867954367	1
FBgn0033485	RpLP0-like	2.287	1.193	2.66524997088203E-6	0.00124322805933435	1	true
FBgn0085211	RpS28-like					1
FBgn0020909	Rtc1	2.422	1.276	0.0524274890825242	0.701785237014595	1
FBgn0014879	Set	1.97	0.979	2.843367786894E-5	0.0070499959153031	1	true
FBgn0032988	Tif-IA	2.076	1.054	0.00280172589375814	0.169542277733094	1
FBgn0043364	cbt	0.583	-0.779	0.0125608787358464	0.376639674230206	10
FBgn0030041	CG12116	2.536	1.342	3.22575895044896E-5	0.00752341071880752	10	true
FBgn0085384	CG34355	1.139	0.188	0.420434258363072	0.999990991829888	10
FBgn0032025	CG7778	0.635	-0.654	0.020679122599847	0.495723292302541	10
FBgn0035964	Dhpr	1.053	0.075	0.823268620936023	0.999990991829888	10
FBgn0014859	Hr38	2.949	1.56	8.79362494851175E-8	8.94951193623536E-5	10	true
FBgn0001233	Hsp83	3.384	1.759	0.0015724587040704	0.119265024191234	10
FBgn0005626	ple	1.531	0.614	0.038983634308959	0.633232913621791	10
FBgn0025620	CG13360	2.702	1.434	0.00517649658287804	0.248716219936994	11
FBgn0037010	CG4825	4.316	2.11	5.62641520692344E-6	0.00190871873459115	11	true
FBgn0026576	CG5991	1.867	0.9	0.0244634467247631	0.540776151281024	11
FBgn0031948	CG7149	1.445	0.531	0.0389498574831878	0.633232913621791	11
FBgn0039111	Plip	1.491	0.576	0.185217050075262	0.911516976311639	11
FBgn0010217	ATPsynbeta	1.285	0.362	0.116546226558925	0.820253456048773	12
FBgn0016120	ATPsynD	0.503	-0.992	4.99530414803484E-6	0.0018057821317027	12	true
FBgn0259722	CG42376	1.895	0.922	0.0375651653272253	0.627674665430279	12
FBgn0032833	COX4	0.975	-0.037	0.894551376277439	0.999990991829888	12
FBgn0035600	Cyt-c1	0.934	-0.099	0.658763695110386	0.999990991829888	12
FBgn0040309	Jafrac1	0.996	-0.006	0.982521610737132	0.999990991829888	12
FBgn0026409	Mpcp	1.352	0.435	0.040087601348624	0.636568364677796	12
FBgn0013673	mt:ATPase8	4.172	2.061	0.076805696283661	0.787891214299683	12
FBgn0013674	mt:CoI	3.39	1.761	0.101011470764409	0.812465912335818	12
FBgn0013675	mt:CoII	2.136	1.095	0.0117354522625516	0.368006689297662	12
FBgn0013676	mt:CoIII	1.899	0.925	0.0482019970700618	0.684256956330549	12
FBgn0013720	pck	0.659	-0.601	0.0777616043139599	0.787891214299683	12
FBgn0033520	Prx2540-1	2.058	1.041	0.0425151755023469	0.648443310284433	12
FBgn0010213	Sod2	0.62	-0.69	0.00299978839899687	0.173106346014278	12
FBgn0250814	UQCR-C2	0.681	-0.555	0.0221655583502098	0.516965470272082	12
FBgn0040734	CG15065	4.143	2.051	0.00528504616033448	0.251091459499514	13
FBgn0040733	CG15068	1.88	0.911	0.0962709149990967	0.812465912335818	13
FBgn0034330	CG18107	3.437	1.781	5.21321044132791E-6	0.00182380909033331	13	true
FBgn0031257	CG4133	0.757	-0.401	0.15305722314061	0.881382774836326	13
FBgn0033249	CG11191	0.797	-0.327	0.213317694612237	0.935456639076172	14
FBgn0040609	CG3348	2.594	1.375	0.00123355584981964	0.1054172346468	14
FBgn0032167	CG5853	5.783	2.532	4.4392084230143E-6	0.00171368752743604	14	true
FBgn0033387	CG8008	1.018	0.026	0.950253802948745	0.999990991829888	14
FBgn0031645	CG3036	3.016	1.593	6.4723889064138E-8	7.24583938073025E-5	15	true
FBgn0037849	CG4596	0.671	-0.576	0.0499793489888429	0.690006174582518	15
FBgn0031268	cold	1.428	0.514	0.173483908134965	0.900688934211899	15
FBgn0085442	NKAIN	0.743	-0.428	0.0716326930525643	0.784764311158227	15
FBgn0011293	a10	0.316	-1.66	0.00908942031306588	0.324063886639403	16
FBgn0050172	CG30172	0.77	-0.377	0.351656660229545	0.987821937342986	16
FBgn0031109	Obp19a	0.245	-2.027	0.0238130663295016	0.538560156684385	16
FBgn0031110	Obp19b	0.403	-1.311	0.0202508589642803	0.489827342050091	16
FBgn0011283	Obp28a	0.356	-1.492	0.00108867430810298	0.10094910416251	16
FBgn0033268	Obp44a	0.603	-0.73	0.00216208572657908	0.142379704170899	16
FBgn0011281	Obp83a	0.382	-1.39	0.0253777511798027	0.550589000887385	16
FBgn0011282	Obp84a	1.353	0.436	0.62349371512972	0.999990991829888	16
FBgn0039678	Obp99a	0.547	-0.871	0.00306401123001177	0.175008192448887	16
FBgn0033010	Atf6	1.344	0.427	0.378956963620759	0.996575806374066	17
FBgn0035232	CG12099	0.953	-0.07	0.740205502731264	0.999990991829888	17
FBgn0038829	CG17271	0.843	-0.247	0.284108223449202	0.966745735953626	17
FBgn0038830	CG17272	2.037	1.026	0.0411914870408741	0.643536240859374	17
FBgn0047135	CG32276	1.596	0.675	0.0786242022555179	0.787891214299683	17
FBgn0015622	Cnx99A	0.68	-0.557	0.0164257652505278	0.4347197209921	17
FBgn0004396	CrebA	2.62	1.39	1.20962767642109E-6	7.12725359870219E-4	17	true
FBgn0035909	ergic53	1.486	0.571	0.0251300366516861	0.547336109563475	17
FBgn0028327	l(1)G0320	1.545	0.627	0.0238712528442309	0.538787652401543	17
FBgn0061492	loj	1.535	0.618	0.0616254369205049	0.747450451056395	17
FBgn0030608	Lsd-2	2.096	1.068	9.67350080650672E-7	6.24128654961349E-4	17	true
FBgn0035771	Sec63	1.264	0.338	0.325269629255344	0.978326407839929	17
FBgn0011509	SrpRbeta	2.162	1.112	0.0147797390671428	0.419116416532875	17
FBgn0011584	Trp1	1.527	0.611	0.0336021920907411	0.605453576364895	17
FBgn0041710	yellow-f	1.039	0.056	0.935407504763642	0.999990991829888	17
FBgn0033246	ACC	0.74	-0.433	0.171574246591827	0.900496987741141	18
FBgn0038363	Acyp2	2.0	1.0	6.19034447924211E-4	0.0714442334485726	18
FBgn0260960	Baldspot	1.477	0.562	0.144081439480031	0.863485928789585	18
FBgn0040637	CG11458	1.919	0.941	0.0138023412959314	0.402388569812376	18
FBgn0039755	CG15531	4.708	2.235	0.128867045298502	0.833911313362272	18
FBgn0023537	CG17896	0.853	-0.23	0.385177609676844	0.997585516242135	18
FBgn0034382	CG18609	134.494	7.071	1.37444443959131E-4	0.0226278022076833	18	true
FBgn0283427	CG3523	1.133	0.18	0.707244065579412	0.999990991829888	18
FBgn0039184	CG6432	14.279	3.836	0.0193829700676417	0.477477625057205	18
FBgn0039030	CG6660	29.553	4.885	0.121962247768537	0.823573788015982	18
FBgn0032394	CG6746	1.925	0.945	0.0022290891546509	0.143417546473085	18
FBgn0037547	CG7910	3.344	1.742	0.0036854681508547	0.19647055213723	18
FBgn0042627	v(2)k05816	2.116	1.082	0.00795469293270758	0.304656849446026	18
FBgn0038252	BigH1	0.008	-6.942	0.115574916234558	0.820253456048773	19
FBgn0001120	gnu	0.022	-5.517	0.00563238806828429	0.257365650712011	19
FBgn0010431	mtrm	0.019	-5.725	0.0241097023416753	0.540676589822032	19
FBgn0003655	swa	0.031	-5.033	0.00240187361368268	0.151915113588574	19
FBgn0023129	aay	5.503	2.46	6.55648855427298E-7	5.24284924036329E-4	2	true
FBgn0000052	ade2	2.565	1.359	0.0160915681563569	0.43455724720235	2
FBgn0020513	ade5	2.564	1.359	1.5330838695645E-5	0.00440073690250631	2	true
FBgn0038467	AdSL	1.747	0.805	0.0113338599575765	0.362521606357339	2
FBgn0034356	CG10924	0.551	-0.861	0.402848825788103	0.999990991829888	2
FBgn0030482	CG1673	4.808	2.265	7.13566933062837E-6	0.00234952406342308	2	true
FBgn0032503	CG16825	0.162	-2.624	0.549576856007276		2
FBgn0029823	CG3011	1.845	0.883	0.111713516785355	0.820253456048773	2
FBgn0032945	CG8665	2.041	1.03	5.77912104695184E-4	0.0703231088267673	2
FBgn0020294	ko	1.013	0.018	0.94574400013463	0.999990991829888	2
FBgn0262559	Mdh2	0.669	-0.579	0.0122742880189552	0.373252603065931	2
FBgn0010222	Nmdmc	4.1	2.035	6.86231174662844E-4	0.0768235800035054	2
FBgn0003067	Pepck	5.072	2.343	8.00279655500534E-9	1.79182614866569E-5	2	true
FBgn0014031	Spat	0.762	-0.392	0.175080825804603	0.902417439405469	2
FBgn0037819	CG14688	2.547	1.349	4.36140883530367E-5	0.00976519438224492	20	true
FBgn0030481	CG1662	1.917	0.939	0.0320549264490926	0.592169804616488	20
FBgn0036837	CG18135	1.376	0.461	0.109875050732388	0.820253456048773	20
FBgn0039149	CG18428	0.872	-0.198	0.699527404810824	0.999990991829888	20
FBgn0040842	CG15212	0.025	-5.307	0.0229380692676543	0.529098221647946	21
FBgn0038132	CG15887	0.273	-1.873	0.186198210028787	0.911516976311639	21
FBgn0038820	CG4000	0.379	-1.4	3.56075047758659E-4	0.0492130883908418	21	true
FBgn0033942	Cpr51A	1.675	0.744	0.0458409717677586	0.674492974247047	21
FBgn0035287	CG13937	0.655	-0.611	0.0460065765492588	0.674750970408513	22
FBgn0031697	CG14024	1.362	0.445	0.275159579515288	0.961426807950577	22
FBgn0032618	CG31743	0.642	-0.639	0.00662617545800981	0.273509494084896	22
FBgn0263005	CG43313	2.009	1.006	0.00354963788743757	0.19013490980796	22
FBgn0035168	CG13889	1.31	0.389	0.581424048421454	0.999990991829888	23
FBgn0045980	niki	0.031	-5.015	0.0343192381414834	0.61081696501416	23
FBgn0261514	NimA	0.095	-3.389	0.0741577754759416	0.787891214299683	23
FBgn0039152	Rootletin	2.033	1.024	1.41915244299582E-4	0.0229970212305698	23	true
FBgn0004427	LysD	0.122	-3.039	0.0246026911715912	0.541200058319877	24
FBgn0004428	LysE	0.101	-3.301	0.0656412050796607	0.764328552898411	24
FBgn0004430	LysS	19.555	4.289	0.325285451424936		24
FBgn0043575	PGRP-SC2	0.25	-2.0	0.00106802674543674	0.100939826735957	24
FBgn0039656	CG11951	1.546	0.629	0.0182883787989743	0.465314546942085	25
FBgn0036351	CG14107	17.3	4.113	0.0322025659421136	0.593336936475381	25
FBgn0046253	CG3502	15.986	3.999	0.116657775554822	0.820253456048773	25
FBgn0004588	Eig71Ea					25
FBgn0001256	ImpL1	4.379	2.13	0.028889631517111	0.570404629336962	25
FBgn0010621	Cct5	1.644	0.718	0.153783028459412	0.882110897735129	26
FBgn0032444	CG5525	1.634	0.709	0.163117251935457	0.89140221778693	26
FBgn0030958	CG6900					26
FBgn0030086	CG7033	1.995	0.996	0.0432464605327206	0.656437470411309	26
FBgn0284436	CG8258	2.071	1.051	0.0197863155386504	0.483641490076836	26
FBgn0038808	Srp14	1.779	0.831	0.114104697713257	0.820253456048773	26
FBgn0003676	T-cp1	2.079	1.056	0.0416760852722685	0.643536240859374	26
FBgn0037632	Tcp-1eta	1.742	0.801	0.0763444790248972	0.787891214299683	26
FBgn0013563	Pex1	1.28	0.356	0.27864138403308	0.96568578108175	27
FBgn0032407	Pex19	1.462	0.548	0.0246270285021649	0.541200058319877	27
FBgn0052250	PMP34	0.555	-0.849	0.0776918578999658	0.787891214299683	27
FBgn0031069	Pmp70	2.177	1.122	0.0041944078462248	0.209728880826536	27
FBgn0027562	CG10345	1.043	0.06	0.838832861560602	0.999990991829888	28
FBgn0035091	CG3829	2.576	1.365	1.31211949663888E-4	0.0222563299467761	28	true
FBgn0015924	crq	1.324	0.405	0.106983369517974	0.819683473114833	28
FBgn0035290	dsb	0.511	-0.967	0.187466339760774	0.911516976311639	28
FBgn0000014	abd-A	31.365	4.971	0.00876575455714385	0.320785436001258	29
FBgn0000015	Abd-B	46.076	5.526	0.0387307837033332	0.633232913621791	29
FBgn0051481	pb	0.432	-1.209	0.0469081915985351	0.681996370059221	29
FBgn0003339	Scr	0.948	-0.078	0.82374794016697	0.999990991829888	29
FBgn0030157	CG1468	0.409	-1.29	3.31580765305541E-5	0.00757560544407252	3	true
FBgn0031558	CG16704	1.686	0.754	0.011512405687227	0.366508472490033	3
FBgn0031561	CG16712	2.318	1.213	3.57063114460191E-6	0.00148048946903031	3	true
FBgn0031560	CG16713	1.557	0.639	0.0411714049773513	0.643536240859374	3
FBgn0040732	CG16926	2.925	1.548	0.00157193031853208	0.119265024191234	3
FBgn0029990	CG2233	1.462	0.548	0.0415916316457755	0.643536240859374	3
FBgn0085195	CG34166	1.933	0.951	0.00870071359740388	0.320785436001258	3
FBgn0002563	Lsp1beta	2.714	1.441	1.20178214433479E-4	0.0213554779457586	3	true
FBgn0002565	Lsp2	3.56	1.832	0.00115946252783153	0.103770489636492	3
FBgn0050381	CG30381	0.361	-1.469	0.00898749476692653	0.323796428410031	30
FBgn0052137	CG32137	0.726	-0.462	0.0415821133473843	0.643536240859374	30
FBgn0031622	CG3251	0.137	-2.868	0.521512219429512		30
FBgn0263117	CG34377	0.517	-0.951	0.153004010797943	0.881382774836326	30
FBgn0033638	CG9005	1.3	0.378	0.186794718004796	0.911516976311639	30
FBgn0285971	fu2	1.338	0.42	0.204626375722571	0.928114045175589	30
FBgn0011297	l(2)not	0.62	-0.689	0.0255563312785331	0.551637348367142	30
FBgn0284243	betaTub56D	0.664	-0.591	0.00707725023018882	0.287064551909289	31
FBgn0003888	betaTub60D	0.971	-0.043	0.846108815358879	0.999990991829888	31
FBgn0003884	tubA84B	0.72	-0.475	0.101478971257994	0.813211942185575	31
FBgn0003885	TubA84D	0.72	-0.475	0.0799228565577731	0.788845188515605	31
FBgn0003886	TUBA85E	0.04	-4.641	0.0592861290753138	0.739546106745915	31
FBgn0000355	Cp15	0.02	-5.631	0.0901117761493207	0.799951407190355	32
FBgn0000358	Cp19	0.129	-2.958	0.0288649391296155	0.570404629336962	32
FBgn0014464	Cp7Fa	0.988	-0.018	0.981119767520325	0.999990991829888	32
FBgn0014466	Cp7Fc	0.175	-2.514	0.0106864464745136	0.354436326693959	32
FBgn0050382	CG30382	0.876	-0.192	0.528278038010568	0.999990991829888	33
FBgn0259222	CG42322	0.818	-0.29	0.302650901357657	0.972243793133698	33
FBgn0004066	Prosalpha4	1.548	0.63	0.0123028325619766	0.373252603065931	33
FBgn0250843	Prosalpha6	0.951	-0.073	0.796408320144108	0.999990991829888	33
FBgn0039744	CG15526					34
FBgn0053082	CG33082	2.793	1.482	0.0266791614644547	0.562473093398439	34
FBgn0261999	CG42817	1.386	0.471	0.0405054518776422	0.639574800804238	34
FBgn0066304	Rpp20	0.642	-0.64	0.0361679584172409	0.62390373707303	34
FBgn0032836	CG10680	1.589	0.668	0.00384212432648778	0.200993373060891	35
FBgn0035439	CG14961	0.621	-0.687	0.409803957598563	0.999990991829888	35
FBgn0250842	CG17575	0.042	-4.56	0.258684379355681	0.954271670900182	35
FBgn0034512	CG18067	1.525	0.609	0.0234246222638913	0.535180910702578	35
FBgn0032835	CG16772	0.737	-0.439	0.0320502981187154	0.592169804616488	36
FBgn0034480	CG16898	0.783	-0.353	0.324058651148605	0.978326407839929	36
FBgn0051131	CG31131	0.359	-1.48	0.216832831508115	0.936513714789101	36
FBgn0034479	CG8654	1.991	0.994	0.00597518067953102	0.262403917064382	36
FBgn0033830	CG10814	0.272	-1.881	0.118718231948298	0.820253456048773	37
FBgn0038795	CG4335	2.242	1.165	9.60263333759406E-4	0.0951340532870492	37
FBgn0030575	CG5321	1.349	0.432	0.221748659122186	0.942440402866123	37
FBgn0011693	Pdh	0.902	-0.149	0.494361995183019	0.999990991829888	37
FBgn0032337	AstCC	0.668	-0.583	0.625450473157294	0.999990991829888	38
FBgn0038199	CCHa1	1.547	0.63	0.088196119414536	0.798156116535836	38
FBgn0038147	CCHa2	2.907	1.539	8.91880985046551E-5	0.0178296564778503	38	true
FBgn0035385	FMRFaR	0.782	-0.354	0.373131780989931	0.993888791112778	38
FBgn0033067	CG11211	0.42	-1.252	0.00400201833644213	0.206463572702625	4
FBgn0036015	CG3088	0.316	-1.663	8.64580296683356E-5	0.0175981389479458	4	true
FBgn0052450	CG32450	0.018	-5.82	0.0715582888818877	0.784764311158227	4
FBgn0039703	CG7829	0.3	-1.735	1.0624944130154E-4	0.0200562068583564	4	true
FBgn0036022	CG8329	0.42	-1.25	0.00555536269624907	0.255027405998877	4
FBgn0040502	CG8343	0.296	-1.758	8.84598339218178E-6	0.002829450973585	4	true
FBgn0030773	CG9676	0.458	-1.128	0.0228990381030481	0.529098221647946	4
FBgn0043783	CG32444	0.43	-1.216	1.41758277184978E-6	7.48654025175136E-4	5	true
FBgn0031418	CG3609	0.696	-0.523	0.105568714119757	0.819683473114833	5
FBgn0040349	CG3699	0.287	-1.799	1.44585227015024E-4	0.0229970212305698	5	true
FBgn0024289	Sodh-1	0.468	-1.095	4.5008396047778E-4	0.0585894178784737	5
FBgn0012042	AttA	0.45	-1.153	0.0011957474911217	0.103770489636492	6
FBgn0041581	AttB	0.382	-1.388	1.33735261592763E-4	0.0223457649780744	6	true
FBgn0041579	AttC	0.375	-1.416	1.41500865723789E-5	0.00428135727507518	6	true
FBgn0260455	CG10332	0.228	-2.13	0.521382367010975	0.999990991829888	6
FBgn0052185	edin	0.353	-1.503	0.0018298343674796	0.124151489357176	6
FBgn0000044	Act57B	0.922	-0.117	0.702012787672444	0.999990991829888	7
FBgn0000045	Act79B	0.362	-1.468	3.8921960597582E-8	4.84145943211034E-5	7	true
FBgn0000047	Act88F	0.406	-1.299	0.00625661536877239	0.264312486993988	7
FBgn0021825	Dmn	0.612	-0.709	0.00142330402400653	0.11417476050987	7
FBgn0085736	CG40472	1.482	0.567	0.530307363731202	0.999990991829888	8
FBgn0033391	CG8026	2.19	1.131	0.00652957942196039	0.270735709736469	8
FBgn0029971	ND-MNLL	0.574	-0.801	0.00419645103217008	0.209728880826536	8
FBgn0085468	ND-MWFE	1.119	0.162	0.633080396838596	0.999990991829888	8
FBgn0035022	CG11413	0.267	-1.907	9.74377414046665E-5	0.0188071640521593	9	true
FBgn0024989	CG3777	1.097	0.133	0.790593328534784	0.999990991829888	9
FBgn0283508	CG43164	59.866	5.904	5.0003792838574E-6	0.0018057821317027	9	true
FBgn0039805	Cpr100A	0.478	-1.066	9.43464652469282E-4	0.0943043462892287	9
FBgn0022770	PeriA	0.822	-0.282	0.526329874113465	0.999990991829888	9
FBgn0260653	serp	0.471	-1.086	1.16723055407661E-4	0.0210760420207866	9	true
Table S7. The table list the genes belonging to the active modules identified at each time point. In addition to the scores calculated by DESeq2 (fold change, log2 FC, P-value and adjusted P-value), each gene is associated with the module to which it belongs, and for each gene, a flag indicates whether the gene is considered to be differentially expressed.
