# Supplementary material for: Temporal and sequential order of nonoverlapping gene networks unraveled in mated female Drosophila
Source: Life Sci Alliance. 2021 Nov 29;5(2):e202101119. doi: 10.26508/lsa.202101119 (PMC8645335; doi:10.26508/lsa.202101119)
Supplement: Supplementary file 8 [file LSA-2021-01119_TableS8.xlsx]

## Sheet: modules 20 days
gene stable ID	Gene name	FoldChange	log2FoldChange	P-value	padj	# module	Is diffExp?
FBgn0000639	Fbp1	0.629	-0.669	0.405719047575014	0.750617416406643	1
FBgn0000640	Fbp2	0.688	-0.539			1
FBgn0002564	Lsp1gamma	0.564	-0.827	0.263964292281021	0.631662983696841	1
FBgn0039685	Obp99b	0.828	-0.273			1
FBgn0283437	PPO1	2.258	1.175	3.84373309745708E-6	4.45338553374347E-4	2	true
FBgn0033367	PPO2	2.032	1.023	2.15373532853413E-4	0.0086454907514207	2	true
FBgn0037515	Sp7	0.659	-0.601	0.0530884539562633	0.302650592810375	2
FBgn0050446	Tdc2	1.419	0.504	0.191501594647515	0.55713134191978	2
FBgn0036232	CG14125	0.027	-5.225	0.0412773585137666	0.265187115990827	3
FBgn0040687	CG14645	0.035	-4.847	0.00268323579865079	0.0492288966624424	3	true
FBgn0085353	CG34324	0.028	-5.167			3
FBgn0034871	CG3906	0.008	-6.992	0.0345089324541167	0.242606678479535	3
FBgn0036203	Muc68D	0.067	-3.906			3
FBgn0034289	CG10910	0.099	-3.339	0.0266083939565122	0.21078167920764	4
FBgn0034295	CG10911	2.181	1.125	0.551694512660478	0.844399930140158	4
FBgn0034296	CG10912	2.309	1.207	0.525169147385742	0.830201786026151	4
FBgn0033788	CG13323	2.157	1.109	0.4593509716614	0.79158277083496	4
FBgn0030929	CG15043	0.286	-1.805	0.208023680275049	0.575752582081553	4
FBgn0034394	CG15096	0.633	-0.66	0.0452660115599327	0.279275675817937	4
Table S8. The table list the genes belonging to the active modules identified at each time point. In addition to the scores calculated by DESeq2 (fold change, log2 FC, P-value and adjusted P-value), each gene is associated with the module to which it belongs, and for each gene, a flag indicates whether the gene is considered to be differentially expressed.
