# Supplementary material for: Temporal and sequential order of nonoverlapping gene networks unraveled in mated female Drosophila
Source: Life Sci Alliance. 2021 Nov 29;5(2):e202101119. doi: 10.26508/lsa.202101119 (PMC8645335; doi:10.26508/lsa.202101119)
Supplement: Supplementary file 14 [file LSA-2021-01119_TableS14.xlsx]

## Sheet: best 100 genes Modules retrieve
#rank	DIAMOnD_node
1	CG16885
2	yl
3	CG16884
4	mtrm
5	swa
6	tum
7	Klp3A
8	pav
9	cmet
10	asp
11	mars
12	pbl
13	RacGAP84C
14	Klp67A
15	ncd
16	sub
17	scra
18	polo
19	cana
20	ald
21	aurB
22	Ndc80
23	borr
24	Det
25	tacc
26	Sse
27	Cap-G
28	BubR1
29	Bub1
30	nesd
31	Cdk1
32	barr
33	rod
34	CG32318
35	Zwilch
36	Mcm5
37	Mcm3
38	Top2
39	Cap-D2
40	Mcm7
41	Cap-D3
42	dpa
43	fzy
44	RnrL
45	CDC45L
46	SAK
47	Mcm6
48	Mcm2
49	grp
50	Ctf4
51	RnrS
52	dup
53	Psf2
54	Ts
55	pch2
56	Mcm10
57	Orc1
58	l(2)dtl
59	POLA
60	rec
61	Claspin
62	SMC3
63	CG8223
64	tos
65	spd-2
66	vtd
67	Pri50
68	CG5923
69	Fen1
70	POLD
71	SMC1
72	Cap-H2
73	6768
74	Orc2
75	Orc6
76	Orc5
77	l(1)G0148
78	Orc4
79	S(faf)240
80	Pole2
81	Sld5
82	Psf3
83	lat
84	Cdk2
85	CG5790
86	mus101
87	Psf1
88	CG10336
89	CG11788
90	CG8142
91	geminin
92	PCNA
93	timeout
94	cutlet
95	DNA-ligI
96	CG3430
97	spel1
98	hdm
99	dUTPase
100	RecQ4
101	spn-A
Table S14. The table lists the genes identified by DIAMOnD at day 1. It also shows the best GO enrichment with biological process terms obtained for the wole list and the top 10, 25 and 50 genes.

## Sheet: GO annotations
top n genes	Best GO BP enrichment	FDR
10 genes	mitotic cell cycle process	0.0094
25 genes	mitotic cell cycle process	7.74e-21
50 genes	cell cycle process	5.11e-45
100 genes	cell cycle	2.27e-61
