# Supplementary material for: Temporal and sequential order of nonoverlapping gene networks unraveled in mated female Drosophila
Source: Life Sci Alliance. 2021 Nov 29;5(2):e202101119. doi: 10.26508/lsa.202101119 (PMC8645335; doi:10.26508/lsa.202101119)
Supplement: Supplementary file 15 [file LSA-2021-01119_TableS15.xlsx]

## Sheet: Modules retrieved by GiGA
Module 1	Module 2	Module 3	Module 4	Module 5	Module 6	Module 7	Module 8	Module 9	Module 10	Module 11	Module 12	Module 13	Module 14	Module 15	Module 16	Module 17	Module 18	Module 19	Module 20	Module 21
CG8736	Ost48	Cat	Act57B	epsilonTry	Pgd	HmgD	CG6543	CG4753	Lerp	ninaE	Pkcdelta	Vm34Ca	Dtg	lft	Ilp6	nrv2	Mbs	Proc	PPO1	CG3301
Cpr97Ea	BigH1	Duox	Act42A	CG11911	Gfat1	Spps	Mtpalpha	CG3209	CG5789	ninaB	CG1677	Vm26Ab	bi	Gug	InR	CG10226	CG9186	NPF	Tsf1	CG17124
verm	CG14814	CG15117	Act88F	Pebp1	Gale	ear	yip2	CG1942	CG31792	Rh4	Acn	Cp38	Fcp3C	ft		Nrx-IV	Fas2	Lk		TBCB
kkv	BicC	Trx-2	mor	Jon65Aii	CG1969	CycT	Hmgs	CG11425	CREG	pyx	Dcp-1	Vm26Aa	CG10154	svp		Mdr65	futsch	Dh44		CG15739
Cpr92F	Msh6	se	retn	CG5246	Oscillin		CG12512	CG10026		trp			brk			NKAIN		Ms
CG7203	Sec61alpha	GstS1	TpnC47D	Jon25Bi	nst											Lac
Acp65Aa	SMC2		fln	CG12057
Cpr97Eb	Cdc6		osa	Jon25Biii
Cpr64Aa	Pen			zetaTry
CG13043	gwl
Cpr76Bd	otu
Obp83g	hrg
Acp1	CycB
Cpr62Bc	beta'COP
Ccp84Aa	Sec23
CG16884	Klp61F
Cda4	CycB3
CG8927	Srp68
Cht5
Table S15. The table lists the modules identified by GiGA at day 1. For modules containing more than three genes, the best GO enrichment with biological process terms is specified.

## Sheet: annotations
module	size	Best GO BP enrichment	FDR
Module 1	19	chitin-based cuticle development	6.98e-16
Module 2	18	mitotic cell cycle	0.0084
Module 3	6	hydrogen peroxide metabolic process	0.0354
Module 4	8	/
Module 5	9	/
Module 6	6	UDP-N-acetylglucosamine biosynthetic process	2.71e-05
Module 7	4	/
Module 8	5	fatty acid beta-oxidation	0.0006
Module 9	5	/
Module 10	4	/
Module 11	5	detection of UV	9.03e-06
Module 12	4	/
Module 13	4	/
Module 14	5	/
Module 15	4	epithelial tube morphogenesis	0.0202
Module 16	2	/
Module 17	6	cell adhesion involved in heart morphogenesis	0.00035
Module 18	4
Module 19	5	body fluid secretion	0.0112
Module 20	2	/
Module 21	4	/
